# Supplementary material
Source: ML conference proceedings conference paper supplement (https://proceedings.neurips.cc/paper_files/paper/2019/hash/3c0cd9bcd0686e8bc0a9047eae120cc5-Abstract.html)
Supplement: Supplementary file [file 3c0cd9bcd0686e8bc0a9047eae120cc5-Supplemental.zip]

## A Further details on the lower bound

Our formal lower bound reads as follows:

**Theorem 9** Let  $\rho \in (0, 1)$ , and let  $C = 12 + 4 \log_d(Q/\rho)$ . Assume that  $\log(N)N\sqrt{\frac{C \log(d)}{d}} \leq \frac{1}{4}$  (i.e.,  $N \lesssim \sqrt{d/\log^3(d)}$ ). Fix a randomized algorithm that queries at most  $Q$  points per iteration (both function value and gradient), and that runs for at most  $N$  iterations. Then, with probability at least  $1 - \rho$ , when run on the shielded Nemirovski function  $f$  one has for any queried point:

$$f(x) - f^* \geq \frac{1}{4\sqrt{N}}.$$

To prove Theorem 9, we consider the following game between the algorithm (player A) issuing the queries, and the adversary (player B) building the hard *shielded Nemirovski* function  $f$  (as defined in Section 2.3 and Section 2.4), i.e., player B chooses the orthonormal vectors in the definition of  $f$ . To make explicit the dependency of the shielded Nemirovski function on the choice of the orthonormal vectors  $v_1, \dots, v_N$ , we denote it by  $f^{v_1, \dots, v_N}$  (with similar notation for the Nemirovski function  $\mathcal{N}$  and the wall function  $\mathcal{W}$ ). We restrict our attention to a deterministic player A and randomized player B, which is without loss of generality thanks to the minimax theorem. The game has  $N$  iterations, and at each iteration  $t$ , players A and B maintain a common set of orthonormal vectors  $\mathcal{V}_t = \{v_1, v_2, \dots, v_t\}$ , and common sets of vectors  $\mathcal{Q}_1, \mathcal{Q}_2, \dots, \mathcal{Q}_t$  where initially  $\mathcal{Q}_0 = \emptyset$ . At each iteration,

1. Simultaneously:

- (a) Player A queries a set of  $Q$  points  $\mathcal{Q}_t = \{z_t^{(1)}, \dots, z_t^{(Q)}\}$  inside the unit ball.
- (b) Player B randomly sample  $N - t + 1$  orthonormal vectors  $v_t^{(t)}, v_t^{(t+1)}, \dots, v_t^{(N)}$  from  $\text{span}(\mathcal{V}_{t-1})^\perp$ .

2. Player B returns  $f^{v_1, v_2, \dots, v_t, v_t^{(t+1)}, \dots, v_t^{(N)}}(x)$  and  $\nabla f^{v_1, v_2, \dots, v_t, v_t^{(t+1)}, \dots, v_t^{(N)}}(x)$  to player A for every  $x \in \mathcal{Q}_t$  where  $v_t := v_t^{(t)}$ .

Note that at each iteration Player B answers the query with a different function, however we will show that in fact with high probability all the given answers are consistent with the final function. More precisely let us introduce the high probability event under which we will carry the proof. We say that Player B wins the game if the following holds:

$$\forall t \in [N], z \in \mathcal{Q}_t, s_1, s_2 \geq t, |\langle x, v_{s_1}^{(s_2)} \rangle| < \sqrt{\frac{C \log d}{d}} \cdot \|P_{V_{t-1}^\perp} x\|.$$

**Lemma 10** Let  $\rho \in (0, 1)$ . Assume  $N \leq \frac{d}{2}$  and let  $C = 12 + 4 \log_d(Q/\rho)$ . Then player B wins with probability at least  $1 - \rho$ .

**Proof** For any  $s_1$  and  $s_2$ , we note that  $v_{s_1}^{(s_2)}$  follows the uniform distribution on the unit sphere restricted on the subspace  $V_{s_1-1}^\perp$ . For any  $x \in \mathcal{Q}_t$ , we have that

$$\langle x, v_{s_1}^{(s_2)} \rangle = \langle P_{V_{s_1-1}^\perp} x, P_{V_{s_1-1}^\perp} v_{s_1}^{(s_2)} \rangle.$$

By [Ball, 1997] Lemma 2.2], we have that

$$\mathbb{P}_{v_{s_1}^{(s_2)}} \left( \left| \langle P_{V_{s_1-1}^\perp} x, P_{V_{s_1-1}^\perp} v_{s_1}^{(s_2)} \rangle \right| \geq t \cdot \|P_{V_{s_1-1}^\perp} x\|_2 \right) \leq 2 \exp(-\dim V_{s_1-1}^\perp \cdot \frac{t^2}{2}).$$

Since  $\dim V_{s_1-1}^\perp = d - s_1 + 1 \geq d - N \geq \frac{d}{2}$  and  $\|P_{V_{s_1-1}^\perp} x\|_2 \leq \|P_{V_{t-1}^\perp} x\|_2$  (using  $t \leq s_1$ ), we have that

$$\mathbb{P} \left( \left| \langle x, v_{s_1}^{(s_2)} \rangle \right| > \sqrt{\frac{C \log d}{d}} \cdot \|P_{V_{t-1}^\perp} x\|_2 \right) \leq 2 \exp(-\frac{d}{2} \cdot \frac{1}{2} \cdot \frac{C \log d}{d}) = 2d^{-\frac{C}{4}}.$$

395 Taking union bound over at most  $N^2$  pairs of  $v_i^{(j)}$  and  $NQ$  many  $x$ , we have that player B wins with  
 396 probability at least  $1 - Q \cdot d^{3-\frac{C}{4}}$ , which concludes the proof. ■

397

398 Next we show that if Player B wins the game, then indeed all answers are consistent with the final  
 399 function.

400 **Lemma 11** Assume player B wins the game and that  $\gamma = 2\delta\sqrt{\frac{C\log(d)}{d}}$ . Then, for all  $t \in [N]$  and  
 401 all  $x \in \mathcal{Q}_t$ , we have that

$$f^{v_1, v_2, \dots, v_t, v_t^{(t+1)}, \dots, v_t^{(N)}}(x) = f^{v_1, v_2, \dots, v_t, v_{t+1}, \dots, v_N}(x) \quad (7)$$

402 and that

$$\nabla f^{v_1, v_2, \dots, v_t, v_t^{(t+1)}, \dots, v_t^{(N)}}(x) = \nabla f^{v_1, v_2, \dots, v_t, v_{t+1}, \dots, v_N}(x) \quad (8)$$

403 **Proof** Fix any  $t \in [N]$  and any  $x \in \mathcal{Q}_t$ . Write  $x = w + z$  with  $w \in V_{t-1}$  and  $z \in V_{t-1}^\perp$ . Since  
 404 player B wins, we have that

$$|\langle z, v_t^{(s)} \rangle| \leq \sqrt{\frac{C\log d}{d}} \cdot \|z\|,$$

405 for all  $s \geq t$ . Lemma 2 shows that

$$\mathcal{W}^{v_1, v_2, \dots, v_t, v_t^{(t+1)}, \dots, v_t^{(N)}}(x) = \mathcal{W}^{v_1, v_2, \dots, v_t, v_{t+1}, \dots, v_N}(x). \quad (9)$$

406 Moreover the equations following Lemma 2 show that (9) also holds for the function  $f$  itself provided  
 407 that  $\|z\| \geq \delta$  (indeed, as discussed there if the argmax index in the definition of the Nemirovski  
 408 function is attained at an index  $\geq t$  then in fact  $f(x) = \mathcal{W}(x)$ , and otherwise the Nemirovski function  
 409 value itself does not depend on  $v_t^{(t+1)}, \dots, v_t^{(N)}$ ).

410 Thus we only need to consider the case where  $\|z\| \leq \delta$ . In this case we prove that (9) also holds for  
 411 the Nemirovski function (and thus it also holds for  $f$ ). Indeed for any  $s > t$

$$\begin{aligned} \langle v_s, x \rangle - \gamma \cdot s &= \langle v_s, z \rangle - \langle v_t, z \rangle + \langle v_t, x \rangle - \gamma \cdot s \\ &\leq 2\sqrt{\frac{C\log d}{d}} \cdot \delta + \langle v_t, x \rangle - \gamma \cdot s \\ &\leq \langle v_t, x \rangle - \gamma \cdot t, \end{aligned}$$

412 where the last inequality uses that  $\sqrt{\frac{C\log d}{d}} \leq \frac{\gamma}{2\delta}$ . This concludes the proof of (7). For (8) we simply  
 413 note that (7) remains true for infinitesimal perturbations of  $x$ . ■

414

415 Finally we show that no queried point could have a suboptimal gap smaller than  $o(1/\sqrt{N})$ .

416 **Lemma 12** Assume player B wins and that  $\log(N)N\sqrt{\frac{C\log(d)}{d}} \leq \frac{1}{4}$ . Then, for all  $t \in [N]$  and all  
 417  $x \in \mathcal{Q}_t$ , we have that

$$f(x) - f^* \geq \frac{1}{4\sqrt{N}}.$$

418 **Proof** First we claim that

$$f(x) - f^* \geq \frac{1}{\sqrt{N}} - \sqrt{\frac{C\log(d)}{d}} - \gamma N.$$

419 This follows from (1), Lemma 1 and the fact that:

$$f(x) \geq \mathcal{N}(x) \geq \langle v_N, x \rangle - \gamma N.$$

420 Next recall from Lemma 11 that we take  $\gamma = 2\delta\sqrt{\frac{C\log(d)}{d}}$ , and from Lemma 1 that  $\frac{\delta}{\log_2(1/\delta)} =$

421  $4\sqrt{\frac{CN\log(d)}{d}} + \frac{1}{\sqrt{N}} \leq \frac{2}{\sqrt{N}}$  where the inequality follows from the assumption on  $N$ . In particular we

422 have  $\delta \leq \frac{\log(N/2)}{\sqrt{N}}$ . Thus:

$$f(x) - f^* \geq \frac{1}{\sqrt{N}} - \sqrt{\frac{C \log(d)}{d}} \left(1 + 2 \log(N/2) \sqrt{N}\right) \geq \frac{1}{4\sqrt{N}},$$

423 where the second inequality follows from the assumption on  $N$ . ■

424

## 425 B Acceleration with Approximate Proximal Step Oracles

426 Here we provide the proofs associated with Section 3.1 and prove Theorem 6. Our proof is split into  
 427 several parts. In Section B.1 we provide the acceleration framework we leverage, in Section B.2 we  
 428 show how to instantiate the framework using our oracles, and in Section B.3 we then prove Theorem 6.  
 429 This analysis relies on a line search result deferred to Appendix E.

### 430 B.1 Framework

431 In this section we present the general acceleration framework based on Monteiro and Svaiter [2013]  
 432 which we leverage to achieve our result. This acceleration framework is given by Algorithm 3 and is  
 433 a noise-tolerant analog of the one present in Bubeck et al. [2018]. The framework maintains points  
 434  $x_k$  and  $y_k$  in each iteration  $k$ . To compute the next point, a careful convex combination of them is  
 435 chosen, denote  $\tilde{x}_k$ , and the next  $y_{k+1}$  is chosen a point that has similar properties to the result of  
 436 an approximate proximal step oracle and the next  $x_{k+1}$  is then the result of moving from  $x_k$  in the  
 437 direction of  $\nabla g(y_{k+1})$ . Here we provide general results regarding the iterates in the general setting  
 438 of Algorithm 3. In the next section we show how to implement the framework and ultimately bound  
 439 the error.

---

#### Algorithm 3: Acceleration Framework

---

1 **Input:**  $x_0 = y_0 = 0_d, \sigma \in (0, 1), A_0 = 0, K > 0$   
 2 **for**  $k = 0, \dots, K - 1$  **do**  
 3     Compute  $\lambda_{k+1} > 0$  and  $y_{k+1} \in \mathbb{R}^d$  such that for  
       
$$a_{k+1} \stackrel{\text{def}}{=} \frac{1}{2} \left[ \lambda_{k+1} + \sqrt{\lambda_{k+1}^2 + 4\lambda_{k+1}A_k} \right], A_{k+1} \stackrel{\text{def}}{=} A_k + a_{k+1}, \tilde{x}_k \stackrel{\text{def}}{=} \frac{A_k}{A_{k+1}}y_k + \frac{a_{k+1}}{A_{k+1}}x_k,$$
  
       the following condition holds  
       
$$\|\lambda_{k+1}\nabla g(y_{k+1}) + y_{k+1} - \tilde{x}_k\| \leq \sigma\|y_{k+1} - \tilde{x}_k\| + \lambda_{k+1}\delta. \quad (10)$$
  
 4     Compute  $x_{k+1}$  such that the following holds  
       
$$\|x_{k+1} - (x_k - a_{k+1}\nabla g(y_{k+1}))\| \leq a_{k+1}\delta \quad (11)$$
  
 5 **end**  
 6 **return**  $y_K$

---

440 **Remark 13** The definition of  $a_{k+1}$  was chosen such that  $\lambda_{k+1}A_{k+1} = a_{k+1}^2$ . To see this, note that  
 441  $a_{k+1}$  is a solution to  $a_{k+1}^2 - \lambda_{k+1}a_{k+1} - \lambda_{k+1}A_k = 0$ , which is equivalent as  $A_{k+1} = A_k + a_k$ .

442 In the following theorem we give a general bound for the quality of the iterates in Algorithm 3.

443 **Theorem 14 (Framework Convergence)** Algorithm 3 above gives for all  $k \geq 1$  that

$$A_k [g(y_k) - g^*] + \frac{1}{2}\|x_k - x^*\|^2 + \sum_{i \in [k]} \frac{(1 - \sigma)A_i}{2\lambda_i} \|y_i - \tilde{x}_{i-1}\|^2 \leq \frac{1}{2}\|x^*\|^2 + \delta_k$$

444 where

$$\delta_k = \delta \sum_{i \in [k]} a_i \|x_i - x^*\| + \frac{\delta^2}{2(1 - \sigma)} \sum_{i \in [k]} a_i^2.$$

445 **Proof** Let  $\Delta_{k+1} \stackrel{\text{def}}{=} x_{k+1} - (x_k - a_{k+1} \nabla g(y_{k+1}))$ ,  $r_k \stackrel{\text{def}}{=} \frac{1}{2} \|x_k - x^*\|^2$ , and  $\varepsilon_k \stackrel{\text{def}}{=} g(y_k) - g^*$  so

$$\frac{1}{2} \|x_{k+1} - x^* - \Delta_{k+1}\|^2 = r_k + a_{k+1} \nabla g(y_{k+1})^\top (x^* - x_k) + \frac{a_{k+1}^2}{2} \|\nabla g(y_{k+1})\|^2.$$

446 Now, since

$$x_k = y_k + \frac{A_{k+1}}{a_{k+1}} (\tilde{x}_k - y_k) = y_{k+1} + \frac{A_{k+1}}{a_{k+1}} (\tilde{x}_k - y_{k+1}) + \frac{A_k}{a_{k+1}} (y_{k+1} - y_k)$$

447 and by convexity  $g(z) \geq g(y_{k+1}) + \nabla g(y_{k+1})^\top (z - y_{k+1})$  for all  $z$  we have

$$a_{k+1} \nabla g(y_{k+1})^\top (x^* - x_k) \leq A_{k+1} \nabla g(y_{k+1})^\top (y_{k+1} - \tilde{x}_k) + A_k \varepsilon_k - A_{k+1} \varepsilon_{k+1}.$$

448 Combining these inequalities and applying Cauchy Schwarz yields

$$\begin{aligned} r_{k+1} &= \frac{1}{2} \|x_{k+1} - x^* - \Delta_{k+1}\|^2 + \Delta_{k+1}^\top (x_{k+1} - x^* - \Delta_{k+1}) + \frac{1}{2} \|\Delta_{k+1}\|^2 \\ &\leq r_k + A_{k+1} \nabla g(y_{k+1})^\top (y_{k+1} - \tilde{x}_k) + A_k \varepsilon_k - A_{k+1} \varepsilon_{k+1} + \frac{a_{k+1}^2}{2} \|\nabla g(y_{k+1})\|^2 \\ &\quad + \|\Delta_{k+1}\| \|x_{k+1} - x^*\| \end{aligned}$$

449 Now rearranging (10) and applying  $(a+b)^2 \leq (1+t)a^2 + (1+t^{-1})b^2$  for  $t = \frac{1-\sigma}{\sigma}$  yields

$$2\lambda_{k+1} \nabla g(y_{k+1})^\top (y_{k+1} - \tilde{x}_k) + \lambda_{k+1}^2 \|\nabla g(y_{k+1})\|^2 \leq -(1-\sigma) \|y_{k+1} - \tilde{x}_k\|^2 + (1-\sigma)^{-1} \lambda_{k+1}^2 \delta^2$$

450 Combining with the facts that  $\lambda_k A_k = a_k^2$  and  $\|\Delta_{k+1}\| \leq a_{k+1} \delta$  yields

$$r_{k+1} + A_{k+1} \varepsilon_{k+1} + \frac{(1-\sigma)A_{k+1}}{2\lambda_{k+1}} \|y_{k+1} - \tilde{x}_k\|^2 \leq r_k + A_k \varepsilon_k + a_{k+1} \delta \|x_{k+1} - x^*\| + \frac{\delta^2}{2(1-\sigma)} a_{k+1}^2$$

451 Summing over  $k$  and using that  $A_0 = 0$  and  $x_0 = 0$  yields the result.  $\blacksquare$

452

453 Next we show that for sufficiently small  $\delta$ , the error in Theorem 14 is increased by only a constant  
454 factor. This will allow us to apply Theorem 14 when  $\delta \neq 0$ .

455 **Lemma 15 (Error Tolerance)** Algorithm 3 with  $\delta \leq c\sqrt{1-\sigma}\|x^*\|/A_K$  for some  $c, K \geq 0$  gives  
456 that  $\delta_k \leq c(1+3c)\|x^*\|^2$ . Consequently, if  $c \leq \frac{1}{4}$  then for all  $k \in [K]$

$$A_k [g(y_k) - g^*] + \frac{1}{2} \|x_k - x^*\|^2 + \sum_{i \in [k]} \frac{(1-\sigma)A_i}{2\lambda_i} \|y_i - \tilde{x}_{i-1}\|^2 \leq \|x^*\|^2 \quad (12)$$

457 In particular, this implies that taking  $\delta \leq \frac{\|x^*\|}{\mu \cdot A_K}$  for  $\mu \stackrel{\text{def}}{=} \frac{4\sqrt{2}}{\sqrt{1-\sigma}}$  then  $\|x_k - x^*\| \leq 2\|x^*\|$ . Further-  
458 more, we have that either  $g(y_k) \leq g^* + \varepsilon$  or  $A_k \leq \frac{\|x^*\|^2}{\varepsilon}$ .

459 **Proof** Theorem 14, the assumption on  $\delta, \sigma \in [0, 1)$  and  $A_K = \sum_{i \in [K]} a_i$  yield that for all  $k \in [K]$

$$\frac{1}{2} \|x_k - x^*\|^2 \leq \frac{1}{2} \|x^*\|^2 + c \|x^*\| \max_{i \in [K]} \|x_i - x^*\| + \frac{c^2}{2} \|x^*\|^2$$

460 Since this holds for all  $k \in [K]$  it clearly holds for  $k \in \arg \max_{i \in [K]} \|x_i - x^*\|$  and therefore

$$\max_{i \in [K]} \|x_i - x^*\|^2 - 2c \|x^*\| \max_{i \in [K]} \|x_i - x^*\| - (1+c^2) \|x^*\|^2 \leq 0$$

461 Solving the quadratic and using  $\sqrt{a+b} \leq \sqrt{a} + \sqrt{b}$  implies that

$$\max_{i \in [K]} \|x_i - x^*\| \leq \frac{1}{2} \left[ 2c \|x^*\| + \sqrt{4c^2 \|x^*\|^2 + 4(1+c^2) \|x^*\|^2} \right] \leq (c + (1+c\sqrt{2})) \|x^*\|.$$

462 Therefore by the definition of  $\delta_k$ , we have

$$\delta_k = c[c + (1 + \sqrt{2}c)] \|x^*\|^2 + \frac{c^2}{2} \|x^*\|^2 \leq (3c^2 + c) \|x^*\|^2$$

463 for all  $k \in [K]$  and (12) follows from Theorem 14 and that  $c(1+3c) \leq \frac{1}{2}$  for  $c \in [0, \frac{1}{4}]$ .  $\blacksquare$

464

## 465 B.2 Leveraging Approximate Proximal Step Oracle

466 Here we show how to implement and bound the convergence of Algorithm 3 given an approximate  
 467 proximal step oracle. First, we show that given  $\lambda_{k+1}\omega(\|y_{k+1} - \tilde{x}_k\|)$  is sufficiently close to 1 then  
 468  $y_{k+1}$  can be computed with an approximate proximal oracle. We show that such a  $y_{k+1}$  can always  
 469 be found (for suitable choice of  $\sigma$ ) in Appendix E

470 **Lemma 16 (Line Search Guarantee)** *If in each iteration  $k$  of Algorithm 3 we choose  $\lambda_{k+1}$  and*  
 471  *$y_{k+1}$  such that for  $d = \|y_{k+1} - \tilde{x}_k\|$*

$$\|\nabla g(y_{k+1}) + \omega(d)(y_{k+1} - \tilde{x}_k)\| \leq \alpha \cdot \omega(d)d + \delta \quad \text{and} \quad \frac{1 - \sigma}{1 - \alpha} \leq \lambda_{k+1}\omega(d) \leq 1$$

472 *for  $\alpha \in [0, 1)$  and  $\omega : \mathbb{R}_+ \rightarrow \mathbb{R}_+$  then (10) is satisfied.*

473 **Proof** Leveraging that the assumptions imply  $|\lambda_{k+1}\omega(d) - 1| = 1 - \lambda_{k+1}\omega(d)$  yields

$$\begin{aligned} \|\lambda_{k+1}\nabla g(y_{k+1}) + y_{k+1} - \tilde{x}_k\| &\leq \lambda_{k+1} \|\nabla g(y_{k+1}) + \omega(d)(y_{k+1} - \tilde{x}_k)\| + |\lambda_{k+1}\omega(d) - 1| \|y_{k+1} - \tilde{x}_k\| \\ &\leq \lambda_{k+1} (\alpha \cdot \omega(d)d + \delta) + (1 - \lambda_{k+1}\omega(d))d \\ &= [1 - (1 - \alpha)\lambda_{k+1}\omega(d)]d + \lambda_{k+1}\delta. \end{aligned}$$

474 Since  $(1 - \alpha)\lambda_{k+1}\omega(d) \geq 1 - \sigma$  by assumption the result follows. ■

475

476 Note that the update  $x_{k+1}$  can simply be read as  $x_{k+1} = x_k - a_{k+1} \cdot v_{k+1}$  where  $\|v_{k+1} -$   
 477  $\nabla g(y_{k+1})\| \leq \delta$ . Consequently,  $v_{k+1}$  can just be the result of a  $\delta$ -approximate gradient oracle  
 478 (Definition 5). Consequently, this lemma shows that Algorithm 3 can be implemented with the oracles  
 479 at our disposal, provided line search can be performed to achieve the guarantee of Lemma 16. We  
 480 discuss this in the next section.

481 Next we bound the diameter of the iterates of the algorithm, i.e. how much the points vary.

482 **Lemma 17 (Diameter Bound)** *If in Algorithm 3 we have  $\delta \leq \frac{\|x^*\|}{\mu \cdot A_K}$  for  $\mu \stackrel{\text{def}}{=} \frac{4\sqrt{2}}{\sqrt{1-\sigma}}$  and some*  
 483  *$K > 0$ . Then for all  $k \in [K]$  and  $\theta \in [0, 1]$  we have  $\|y_k - x^*\| \leq \mu\|x^*\|$  and  $\|\tilde{x}_\theta - x^*\| \leq \mu\|x^*\|$*   
 484 *for  $\tilde{x}_\theta = (1 - \theta)x_k + \theta y_k$ .*

485 **Proof** Let  $D_k = \|y_k - x^*\|$ . Using  $\tilde{x}_k = \frac{A_k}{A_{k+1}}y_k + \frac{a_{k+1}}{A_{k+1}}x_k$ , we have

$$\|\tilde{x}_k - x^*\| \leq \frac{A_k}{A_{k+1}}D_k + \frac{2a_{k+1}}{A_{k+1}}\|x^*\|.$$

486 Hence,  $D_{k+1} \leq \frac{A_k}{A_{k+1}}D_k + \frac{2a_{k+1}}{A_{k+1}}\|x^*\| + \|y_{k+1} - \tilde{x}_k\|$ . Rescaling and summing over  $k$  yields

$$\begin{aligned} D_{k+1} &\leq 2\|x^*\| + \|y_{k+1} - \tilde{x}_k\| + \frac{A_k}{A_{k+1}}\|y_k - \tilde{x}_{k-1}\| + \frac{A_{k-1}}{A_{k+1}}\|y_{k-1} - \tilde{x}_{k-2}\| + \dots \\ &\leq 2\|x^*\| + \frac{1}{A_{k+1}} \sum_{j=1}^{k+1} A_j \|y_j - \tilde{x}_{j-1}\| \\ &\leq 2\|x^*\| + \frac{\sqrt{\sum_{j=1}^{k+1} A_j \lambda_j}}{A_{k+1}} \sqrt{\sum_{j=1}^{k+1} \frac{A_j}{\lambda_j} \|y_j - \tilde{x}_{j-1}\|^2} \\ &\leq 2\|x^*\| + \frac{\sqrt{\sum_{j=1}^{k+1} \lambda_j}}{\sqrt{A_{k+1}}} \sqrt{\frac{2\|x^*\|^2}{1 - \sigma}} \\ &\leq 2\|x^*\| + \frac{2\sqrt{2}}{\sqrt{1 - \sigma}}\|x^*\| \leq \mu\|x^*\| \end{aligned}$$

487 where we used  $A_j$  is increasing and Lemma 15 in the third to last equation, and equation 14 for the  
 488 second to last. The assumption on the relation between  $\alpha$  and  $\sigma$  implies  $\sigma = \frac{1+\alpha}{2} = [\frac{1}{2}, 1)$  and the  
 489 definition of  $\mu$  gives the last inequality.

490 The second part of the claim follows by observing that  $\tilde{x}_\theta$  is a convex combination of  $x_k$  and  $y_k$ ,  
 491 therefore

$$\|\tilde{x}_\theta - x^*\| \leq \max\{\|x_k - x^*\|, \|y_k - x^*\|\} \leq \mu\|x^*\|.$$

492

493

494 Finally, we bound the growth of  $A_k$ ; this is crucial to derive the final convergence rate of the algorithm.

495 **Lemma 18 (Growth of  $A_k$ )** Let  $\rho \stackrel{\text{def}}{=} \frac{1-\alpha}{1-\sigma} = 2$  and  $\mu \stackrel{\text{def}}{=} \frac{4\sqrt{2}}{\sqrt{1-\sigma}} = \frac{8}{\sqrt{1-\alpha}}$ . If in Algorithm 3 for  
 496  $K \geq 0$  we have  $\delta \leq \frac{\|x^*\|}{\mu \cdot A_K}$  and  $\lambda_k \geq \frac{1}{\rho \cdot \omega(\|y_k - \tilde{x}_{k-1}\|)}$  for all  $k \in \{0, \dots, K\}$  then for all  $J \in (0, \frac{k}{2})$   
 497 we have

$$A_k \geq \min \left\{ \frac{4^J}{\rho \cdot \omega(\mu\|x^*\|/4)}, \frac{(k/J)^2}{16\rho \cdot \omega\left(\frac{4\mu\|x^*\|}{(k/J)^{3/2}}\right)} \right\}.$$

498 Further, if  $\|x^*\| \leq R$ , for all  $k \in [K]$  then  $A_k \geq \frac{1}{2\omega(2\mu R)}$ .

499 **Proof** Let  $d_k \stackrel{\text{def}}{=} \|y_k - \tilde{x}_{k-1}\|$ . By (12) of Lemma 15 we obtain for all  $k \in [K]$

$$\sum_{i \in [k]} \frac{A_i}{\lambda_i} d_i^2 \leq \frac{2\|x^*\|^2}{1-\sigma}. \quad (13)$$

500 Since  $A_0 = 0$  we have  $A_1 = a_1 = \lambda_1$  and consequently, (13) yields  $d_1^2 \leq \frac{2\|x^*\|^2}{1-\sigma}$  and therefore  
 501  $d_1 \leq \frac{\sqrt{2}}{4}\|x^*\|$ . Since  $\omega$  is monotonic the assumptions imply

$$A_1 = \lambda_1 \geq \frac{1}{c \cdot \omega(d_1)} \geq \frac{1}{\rho \cdot \omega(\mu\|x^*\|/4)}.$$

502 Since the  $A_k$  increase monotonically this immediately implies  $A_k \geq A_1 \geq 1/[\rho\omega(\mu\|x^*\|/4)]$  as  
 503 desired. Further, this implies that if  $A_k \geq 4^J A_1$  then the result holds.

504 On the other hand, suppose  $A_k < 4^J A_1$ . Then, for some  $1 \leq i \leq j \leq k$  we have  $A_j < 4A_i$  and  
 505  $|j - i| \geq k/J$ . The construction of  $A_k$  then implies

$$\sqrt{A_j} > \sqrt{A_j} - \sqrt{A_i} = \sum_{t=i}^{j-1} [\sqrt{A_{t+1}} - \sqrt{A_t}] = \sum_{t=i}^{j-1} \frac{a_{t+1}}{\sqrt{A_{t+1}} + \sqrt{A_t}} \geq \frac{1}{2} \sum_{t=i}^{j-1} \sqrt{\lambda_{t+1}} \quad (14)$$

506 Hence, at least  $\lceil \frac{j-i}{2} \rceil$  many  $\lambda$ 's have value less than  $\frac{16A_j}{(j-i)^2}$ . Letting  $S$  denote the indices of these  $\lambda$   
 507 we have by (13) that

$$\frac{2\|x^*\|^2}{1-\sigma} \geq \sum_{t \in S} \frac{A_t}{\lambda_t} d_t^2 \geq \left\lceil \frac{j-i}{2} \right\rceil \frac{A_i}{\left(\frac{16A_j}{(j-i)^2}\right)} \cdot \frac{1}{|S|} \sum_{t \in S} d_t^2 \geq \frac{(k/J)^3}{32 \cdot 4} \cdot \frac{1}{|S|} \sum_{t \in S} d_t^2$$

508 Consequently,  $d_t \leq \frac{16}{\sqrt{1-\sigma}} \frac{\|x^*\|}{(k/J)^{3/2}} \leq \frac{4\mu\|x^*\|}{(k/J)^{3/2}}$  and  $\lambda_t < \frac{16A_j}{(j-i)^2} \leq \frac{16A_j}{(k/J)^2}$  for some  $t \in [k]$ . However,  
 509 the monotonicity of  $\omega$  and the assumptions on  $\lambda$  also imply

$$\lambda_t \geq \frac{1}{\rho \cdot \omega(d_t)} \geq \frac{1}{\rho \cdot \omega\left(\frac{4\mu\|x^*\|}{(k/J)^{3/2}}\right)}$$

510 and the result now follows by observing that

$$A_k \geq A_t \geq \lambda_t \frac{(k/J)^2}{16}$$

511 giving the second term in the result. ■

512

### 513 B.3 Putting It All Together

514 Here we put together the analysis from the preceding sections and prove Theorem 6. Our proof relies  
 515 on the following theorem giving our main guarantee regarding such a line search algorithm (See  
 516 Section E for the proof.)

517 **Theorem 19 (Line Search Algorithm)** *Let  $g : \mathbb{R}^d \rightarrow \mathbb{R}$  be a twice differentiable function that is*  
 518 *minimized at a point  $x^* \in \mathbb{R}^d$  with  $\|x^*\| \leq R$ . Further, let  $\omega : \mathbb{R}_+ \rightarrow \mathbb{R}_+$  be a continuously*  
 519 *differentiable function where  $0 < \omega'(s) \leq \gamma \frac{\omega(s)}{s}$  for some fixed  $\gamma \geq 1$  and all  $s > 0$ . Further, let*  
 520  $\mu \stackrel{\text{def}}{=} \frac{8}{\sqrt{1-\alpha}}$  *and suppose*

$$\delta \leq \min \left\{ \frac{\varepsilon}{\mu \cdot R \cdot 9c[(1+\alpha)c+1]}, 8\mu R \cdot \omega(8\mu R) \right\} \text{ and } 64 \left( \alpha + \frac{1}{c} \right) \gamma^2 \leq 1 \text{ for some } c \geq 1.$$

521 *Then for any inputs  $x^{(1)}, x^{(2)}$  with  $\|x^{(1)}\|, \|x^{(2)}\| \leq 2\mu R$ ,  $\frac{1}{2\omega(2\mu R)} \leq A \leq \frac{R^2}{\varepsilon}$  there is an algorithm*  
 522 *that returns  $y$  and  $\lambda$  such that  $\tilde{x} = \frac{a}{A+a}x^{(1)} + \frac{A}{A+a}x^{(2)}$  for  $a = \frac{\lambda + \sqrt{\lambda^2 + 4\lambda A}}{2}$  that either satisfies*

$$g(y) \leq g^* + \varepsilon \quad \text{and} \quad \omega(\|y - \tilde{x}\|_2) \cdot \|y - \tilde{x}\|_2 \leq c \cdot \delta$$

523 *or, satisfies*

$$\frac{1}{2} \leq \lambda \cdot \omega(\|y - \tilde{x}\|_2) \leq 1 \quad , \quad \omega(\|y - \tilde{x}\|_2) \cdot \|y - \tilde{x}\|_2 > c \cdot \delta,$$

524 *and*

$$\|\nabla g(y) + \omega(\|y - \tilde{x}\|_2) \cdot (y - \tilde{x})\| \leq \alpha \cdot \omega(\|y - \tilde{x}\|_2) \cdot \|y - \tilde{x}\|_2 + \delta$$

525 *after*

$$6 + \log_2 \left[ \left( \frac{160\mu R c}{\delta} + \frac{9R^2}{\varepsilon} \right) \cdot \omega(8c\mu R) \right]$$

526 *calls to the  $(\alpha, \delta)$ -approximate  $\omega$ -proximal step oracle  $\mathcal{T}_{\text{prox}}$  for  $g$ .*

527 Leveraging this we can prove our main theorem regarding our acceleration framework. We first give  
 528 this result below as a slightly more general result and then use it to immediately improve the theorem.

529 **Theorem 20 (General Tunable Acceleration Framework)** *Let  $g : \mathbb{R}^d \rightarrow \mathbb{R}$  be a convex twice-*  
 530 *differentiable function minimized at  $x^*$  with  $\|x^*\| \leq R$ ,  $\varepsilon > 0$ ,  $\alpha \in [0, 1)$ , and  $c \geq 150, \gamma \geq 1$  such*  
 531 *that  $64(\alpha + c^{-1})\gamma^2 \leq 1$ . Further, let  $\omega : \mathbb{R}_+ \rightarrow \mathbb{R}_+$  be a monotonically increasing continuously*  
 532 *differentiable function with  $0 < \omega'(s) \leq \gamma \cdot \omega(s)/s$  for all  $s > 0$ . There is an algorithm which for all*  
 533  *$k$  computes a point  $y_k$  with*

$$g(y_k) - g^* \leq \max \left\{ \varepsilon, \frac{32 \cdot \omega \left( \frac{4\mu \|x^*\|}{k^{3/2}} \right) \|x^*\|^2}{k^2} \right\} \quad \text{where} \quad \mu \stackrel{\text{def}}{=} \frac{8}{\sqrt{1-\alpha}}$$

534 *using  $k(6 + \log_2[(1500\mu^3 R^3 c^2[(1+\alpha)c+1]) \cdot \omega(8c\mu R) \cdot \varepsilon^{-1}])^2$  queries to a  $(\alpha, \delta)$ -approximate*  
 535  *$\omega$ -proximal step oracle for  $g$  and a  $\delta$ -approximate gradient oracle for  $g$  provided that it holds that*  
 536  $\delta \leq \varepsilon/[20\mu^3 R[(1+\alpha)c+1]]$  *and  $\varepsilon \leq 72c[(1+\alpha)c+1](\mu R)^3 \cdot \omega(8\mu R)$ .*

537 **Proof** Consider an application of Algorithm 3 where in each iteration  $k$  we invoke Theorem 19  
 538 with  $x^{(1)} = y_k$ ,  $x^{(2)} = x_k$ , and  $A = A_k$  to compute  $y_{k+1} = y$  and  $\lambda_k = \lambda$ . Now supposing that  
 539  $A_k \leq R^2/\varepsilon$  and that in this invocation we choose the  $\delta$  of Theorem 19 to be  $\delta' \stackrel{\text{def}}{=} \min\{\varepsilon'/(\mu R), 8\mu R \cdot$   
 540  $\omega(8\mu R)\} = \varepsilon'/(\mu R)$  for  $\varepsilon' \stackrel{\text{def}}{=} \varepsilon/[\mu \cdot R \cdot 9c[(1+\alpha)c+1]]$ , we have that the conditions of Lemma 15  
 541 and Theorem 19 are met as  $\varepsilon' \leq \varepsilon$ . Further, if  $\omega(\|y - \tilde{x}\|_2) \cdot \|y - \tilde{x}\|_2 \leq c \cdot \delta'$  then we output  $y_{k+1}$   
 542 and are guaranteed that  $g(y_{k+1}) \leq g^* + \varepsilon$  by Theorem 19 and the choice of parameters.

543 Otherwise,  $\omega(\|y - \tilde{x}\|_2) \cdot \|y - \tilde{x}\|_2 > c \cdot \delta'$  and the necessary conditions are met for Algorithm 3 to  
 544 proceed by Lemma 16. Further, in this case, we have that

$$\lambda_{k+1} \leq \frac{1}{\omega(\|y_{k+1} - \tilde{x}_k\|)} \leq \frac{\|y_{k+1} - \tilde{x}_k\|}{c \cdot \delta'} \leq \frac{2\mu \|x^*\|}{c \cdot \delta'}.$$

Furthermore, the assumption that  $A_k \leq \frac{\|x^*\|^2}{\varepsilon}$ , Remark 13 and the assumption on  $\delta$  yield

$$A_{k+1} = A_k + a_{k+1} \leq A_k + \sqrt{A_{k+1}} \cdot \sqrt{\frac{2\mu\|x^*\|}{c \cdot \delta'}} \leq \frac{\|x^*\|^2}{\varepsilon} + \frac{1}{2}A_{k+1} + \frac{\mu\|x^*\|}{c\delta'}$$

which implies that

$$A_{k+1} \leq \frac{2\|x^*\|^2}{\varepsilon} + \frac{2\mu\|x^*\|}{c \cdot \delta'} \leq \frac{2R^2}{\varepsilon} + \frac{19\mu^2 R^2[(1+\alpha)c+1]}{\varepsilon} \leq \frac{20\mu^2 R^2[(1+\alpha)c+1]}{\varepsilon}$$

Since,  $\|x^*\|/(\mu A_{k+1}) \geq \varepsilon/[20\mu^3 R[(1+\alpha)c+1]] \geq \delta$  by the assumption  $c \geq 150$ , we have that Lemma 15 still holds and therefore either  $A_{k+1} \leq \|x^*\|^2/\varepsilon$  or  $g(y_{k+1}) - g^* \leq \varepsilon$  and we can repeat the inductive argument.

Consequently, if after  $k$  steps we have not already returned an  $\varepsilon$ -approximate point then we have from Lemma 15 and Lemma 18 the convergence rate to an  $\varepsilon$ -optimal point of the general framework as

$$g(y_k) - g^* \leq \frac{\|x^*\|^2}{A_k} \leq \min_{J \in [\frac{k}{2}]} \max \left\{ \frac{2 \cdot \omega(\mu\|x^*\|/4)}{4^J}, \frac{32 \cdot \omega\left(\frac{4\mu\|x^*\|}{(k/J)^{3/2}}\right)}{(k/J)^2} \right\} \|x^*\|^2$$

and the convergence rate follows by considering  $J = \lceil 1 + \log_4(2\|x^*\|^2\omega(\mu\|x^*\|/4)/\varepsilon) \rceil$  and the monotonicity of  $\omega$ . Putting together with Theorem 19 we have that for

$$\begin{aligned} \mathcal{K} &\stackrel{\text{def}}{=} \left\lceil 1 + \log_4 \left( \frac{2\|x^*\|^2\omega(\mu\|x^*\|/4)}{\varepsilon} \right) \right\rceil \cdot \left( 6 + \log_2 \left[ \left( \frac{160\mu\|x^*\|c}{\delta'} + \frac{9\|x^*\|^2}{\varepsilon} \right) \cdot \omega(8c\mu\|x^*\|) \right] \right) \\ &\leq \left( 6 + \log_2 \left[ \frac{170\mu^2 R^2 c}{\varepsilon'} \cdot \omega(8c\mu R) \right] \right) \cdot \left\lceil 1 + \frac{1}{2} \log_2 \left( 2R^2 \frac{\omega(\frac{\mu R}{4})}{\varepsilon} \right) \right\rceil \\ &\leq \left( 6 + \log_2 \left[ \frac{170\mu^2 R^2 c}{\varepsilon'} \cdot \omega(8c\mu R) \right] \right)^2 \leq \left( 6 + \log_2 \left[ \frac{1500\mu^3 R^3 c^2[(1+\alpha)c+1]}{\varepsilon} \cdot \omega(8c\mu R) \right] \right)^2 \end{aligned}$$

$\mathcal{K}$  queries to a  $(\alpha, \delta')$ -approximate  $\omega$ -proximal step oracle is needed at each iteration. ■

555

556

Leveraging this, we prove Theorem 6

**Proof** [Proof of Theorem 6] Consider invoke Theorem 20 with  $c = 150\gamma^2$ . Since  $\gamma \geq 1$  we have  $c \geq 150$ . Further, since  $\alpha \leq 1/(128\gamma^2)$  and  $c^{-1} \leq 1/(128\gamma^2)$  we have  $64(\alpha + c^{-1})\gamma^2 \leq 1$ . Further, under these assumptions we have  $\mu \stackrel{\text{def}}{=} 8/(\sqrt{1-\alpha}) \leq 10$  and  $[(1+\alpha)c+1] \leq 200\gamma^2$ . Consequently,  $\delta$  and  $\varepsilon$  are constrained sufficiently to invoke Theorem 20 and the result follows. ■

562

## C Applications

Here we briefly sketch several applications of the acceleration framework described in Section 3.1. First we show how minimizing the regularized  $p$ -th order Taylor approximation to  $g$  yields an approximate  $\omega$ -proximal step oracle.

**Lemma 21 (Accelerated Taylor Descent)** Suppose that  $\nabla^p g$  is  $L_p$ -Lipschitz and that  $\mathcal{T}(x) \stackrel{\text{def}}{=} \arg \min_y g_p(y; x) + \frac{L_p+L}{p!} \|y-x\|^{p+1}$  where  $g_p(y; x)$  is the value of the  $p$ 'th order Taylor approximation of  $g$  about  $x$  evaluated at  $y$  and  $L \geq 0$ . Then,  $\mathcal{T}_{\text{prox}}$  is a  $((1+p)^{-1}(1+L/L_p)^{-1}, 0)$ -approximate  $\omega$ -proximal step oracle (Definition 4) for  $\omega(d) \stackrel{\text{def}}{=} \frac{(L_p+L) \cdot (p+1)}{p!} d^{p-1}$ .

**Proof** Let  $y = \mathcal{T}_{\text{prox}}(x)$  for arbitrary  $x$ . The optimality conditions of  $y$  yield that

$$\nabla_y g_p(y; x) = \frac{(p+1)(L_p+L)}{p!} \|y-x\|^{p-1}(x-y) = \omega(\|y-x\|)(x-y).$$



Further, since Taylor expansion of  $\nabla g(y)$  yields

$$\begin{aligned}\|\nabla g(y) + \omega(\|y - x\|)(y - x)\| &= \|\nabla g(y) - \nabla_y g_p(y; x)\| \leq \frac{L_p}{p!} \|y - x\|^p \\ &= \frac{L_p}{(1+p)(L_p + L)} \omega(\|y - x\|) \|y - x\|\end{aligned}$$

the result follows by observing that  $\alpha = (1+p)^{-1}(1+L/L_p)^{-1}$  and  $\delta = 0$ , as claimed.  $\blacksquare$

574

Now, note that for  $\omega(d)$  defined in this lemma we have that  $\omega'(d) = (p-2)\omega(s)/s$ . Consequently, with respect to Theorem 6 we have that  $\gamma = p-2$  and  $\alpha = (1+p)^{-1}(1+L/L_p)^{-1}$  for the oracle defined in this lemma. Consequently, by picking  $L = O(L_p \text{poly}(p))$  this oracle satisfies the necessary conditions of the theorems and therefore (up to logarithmic factors) with  $k$  queries to the oracle and a gradient oracle invoking Theorem 6 yields that one can compute a point  $y_k$  with

$$g(y_k) - g^* \lesssim \frac{\omega(\frac{\|x^*\|}{k^{3/2}}) \|x^*\|^2}{k^2} \lesssim \frac{(L_p + L) \cdot (p+1) \cdot \|x^*\|^{p+1}}{p! \cdot k^{\frac{3p+1}{2}}}.$$

This matches the rate of [Gasnikov et al., 2018, Jiang et al., 2018, Bubeck et al., 2018] up to polylogarithmic factors.

Next we show how approximately minimizing a regularization of  $g$  yields an approximate  $\omega$ -proximal step oracle.

**Lemma 22 (Approximate Proximal Point)** Suppose that  $g$  is  $L$ -smooth and convex and that  $\mathcal{T}(x)$  is a point  $y_x$  where for  $G_x(y) \stackrel{\text{def}}{=} g(y) + \frac{\kappa}{2} \|y - x\|^2$  we have  $G_x(y_x) - G_x^* \leq \rho$  where  $G_x^*$  is the minimum value of  $G_x$ . Then,  $\mathcal{T}_{\text{prox}}$  is a  $(0, \rho(L + \kappa))$ -approximate  $\omega$ -proximal step oracle (Definition 4) for  $\omega(d) \stackrel{\text{def}}{=} \kappa$ .

**Proof** Since  $G$  is  $L + \kappa$ -smooth we have that

$$\rho \geq \frac{1}{L + \kappa} \|\nabla G_x(y_x)\| = \frac{1}{L + \kappa} \|\nabla g(y_x) + \kappa(y_x - x)\|.$$

The result follows by observing that  $\alpha = 0$  and  $\delta = \rho(L + \kappa)$ , as claimed.  $\blacksquare$

590

Now, note that for  $\omega(d)$  defined in this lemma we have that  $\omega'(d) = 0$ . Consequently, with respect to Theorem 6 we have that  $\gamma = 0$  and  $\alpha = 0$  for the oracle defined in this lemma. Consequently, this oracle satisfies the necessary conditions of the theorems for some  $\varepsilon$  so long as  $\rho = O(\varepsilon / (\|x^*\|(L + \kappa)))$  and therefore (up to logarithmic factors) with  $k$  queries to the oracle and a gradient oracle invoking Theorem 6 yields that one can compute a point  $y_k$  with

$$g(y_k) - g^* \lesssim \frac{\omega(\frac{\|x^*\|}{k^{3/2}}) \|x^*\|^2}{k^2} \lesssim \frac{\kappa \cdot \|x^*\|^2}{k^2}.$$

This matches the rate of [Frostig et al., Lin et al., 2015] up to polylogarithmic factors with slightly stronger assumptions. We leave it to future work to use this framework to fully generalize this result and develop further applications.

## D Upper Bound

Here we provide the proofs associated with Section 3.2 and prove Theorem 3. Our proof is split into several parts. In Section D.1 we provide basic facts about the convolved function we optimize, in Section D.2 we analyze our algorithm for approximating the gradient, in Section D.3 we then analyze our algorithm for computing an approximate proximal step, and in Section D.4 we then put everything together to prove Theorem 3.

Throughout this section we use  $\|\cdot\|_{op}$  to denote the operator norm of a matrix and  $D$  as the differential operator.

## 607 D.1 Gaussian Convolution for Approximation

608 Here we prove Lemma 7 which provides basic facts about  $g$ , e.g. convexity and continuity, that we  
609 use throughout our analysis.

610 **Proof** [Proof of Lemma 7] Since  $g$  is a weighted linear combination of shifted  $f$ , i.e.

$$g(y) = \int_{\mathbb{R}^d} \gamma_r(x) f(y-x) dx$$

611 and as  $f$  is convex, so is  $g$ . Similarly, we have  $g$  is  $L$ -Lipschitz. Finally, we note that

$$|g(y) - f(y)| \leq \int_{\mathbb{R}^d} \gamma_r(y-x) |f(x) - f(y)| dx \leq L \int_{\mathbb{R}^d} \gamma_r(y-x) \|x-y\|_2 dx = L \cdot \mathbb{E}_{x \sim \gamma_r} \|x\|_2 \leq L\sqrt{d} \cdot r$$

612 where we used  $\mathbb{E}_{x \sim \gamma_r} \|x\|_2 \leq \sqrt{\mathbb{E}_{x \sim \gamma_r} \|x\|_2^2} \leq \sqrt{d} \cdot r$ .

613 Next, we note that  $\nabla g = \gamma_r * \nabla f$  and hence  $\nabla^2 g = \nabla \gamma_r * \nabla f$

$$v^\top \nabla^2 g(y) v = \int_{\mathbb{R}^d} \gamma_r(y-x) \cdot \left\langle -\frac{y-x}{r^2}, v \right\rangle \cdot \langle \nabla f(x), v \rangle dy.$$

614 So we have for any  $\|v\|_2 = 1$ , by the fact that  $f$  is  $L$ -Lipschitz that

$$|v^\top \nabla^2 g(y) v| \leq \frac{L}{r} \cdot \int_{\mathbb{R}^d} \gamma_r(y-x) \left| \left\langle \frac{y-x}{r}, v \right\rangle \right| dy = \frac{L}{r} \cdot \mathbb{E}_{\zeta \sim \mathcal{N}(0,1)} |\zeta| = \frac{L}{r} \cdot \sqrt{\frac{2}{\pi}} \leq \frac{L}{r}.$$

615 and therefore  $\|\nabla^2 g(y)\|_{\text{op}} \leq \frac{L}{r}$ . ■

616

## 617 D.2 Noisy Gradient Oracle: Sampling

618 In this section we prove Lemma 8 bounding the performance of Algorithm 1 for approximating the  
619 gradient of  $g$ . We begin by studying each sampled vector in Algorithm 1.

620 **Lemma 23 (Statistics of one sample)** *Given a  $L$ -Lipschitz function  $f$  on  $\mathbb{R}^d$ , a vector  $c$ , radius  
621  $r > 0$ , and error parameter  $1 > \eta > 0$ . Sample  $x$  according to  $\gamma_r(x-c)$ . Define the vector field*

$$\ell(y) \stackrel{\text{def}}{=} \frac{\gamma_r(y-x)}{\gamma_r(c-x)} \cdot \nabla f(x) \cdot \chi((x-c)^\top (y-c)) \cdot 1_{\|x-c\| \leq (\sqrt{d} + \frac{1}{\eta})r}.$$

622 For any  $y$  such that  $\|y-c\| \leq \frac{\eta}{4}r$ , we have that

$$\|\mathbb{E}\ell(y) - \nabla(\gamma_r * f)(y)\|_2 \leq 2L \cdot \exp(-\frac{1}{2\eta^2}),$$

$$\|\ell(y)\|_2 \leq 3L,$$

$$\|D\ell(y)\|_{\text{op}} \leq \frac{20L\sqrt{d}}{r\eta}.$$

623 **Proof** For the bias, we note that

$$\begin{aligned} \mathbb{E}\ell(y) &= \int_{\mathbb{R}^d} \frac{\gamma_r(y-x)}{\gamma_r(x-c)} \cdot \nabla f(x) \cdot \chi((x-c)^\top (y-c)) \cdot \gamma_r(x-c) \cdot 1_{\|x-c\| \leq (\sqrt{d} + \frac{1}{\eta})r} dx \\ &= \int_{\mathbb{R}^d} \gamma_r(y-x) \cdot \nabla f(x) \cdot \chi((x-c)^\top (y-c)) \cdot 1_{\|x-c\| \leq (\sqrt{d} + \frac{1}{\eta})r} dx \\ &= \nabla(\gamma_r * f)(y) - \int_{\mathbb{R}^d} \gamma_r(y-x) \cdot \nabla f(x) \cdot \beta(y, x) dx \end{aligned}$$

624 where

$$\beta(y, x) = 1 - \chi((x-c)^\top (y-c)) \cdot 1_{\|x-c\| \leq (\sqrt{d} + \frac{1}{\eta})r}.$$

625 Since  $1 \geq \beta(y, x) \geq 0$  for all  $x, y$ , we have

$$\begin{aligned} \|\mathbb{E}\ell(y) - \nabla(\gamma_r * f)(y)\|_2 &\leq \int_{\mathbb{R}^d} \gamma_r(y-x) \cdot \|\nabla f(x)\|_2 \cdot \beta(y, x) dx \\ &\leq L \cdot \int_{\mathbb{R}^d} \gamma_r(y-x) \cdot \beta(y, x) dx \\ &\leq L \cdot \mathbb{P}_x [\beta(y, x) > 0]. \end{aligned}$$

626 Now, we note that  $\beta(y, x) > 0$  implies either  $\|x - c\| > (\sqrt{d} + \frac{1}{\eta})r$  or  $|(x - c)^\top (y - c)| > \frac{r^2}{2}$ .

627 By a tail bound of Chi-square distribution [Laurent and Massart 2000], we have

$$\mathbb{P}_x \left( \|x - c\| > \left( \sqrt{d} + \frac{1}{\eta} \right) r \right) \leq \exp \left( -\frac{1}{2\eta^2} \right). \quad (15)$$

628 Next, we note that for any fixed  $c$  and  $y$ ,  $(x - c)^\top (y - c)$  follows the normal distribution  $\mathcal{N}(\|y - c\|^2, \|y - c\|^2 r^2)$  when  $x$  is sampled from  $\gamma_r(y - x)$ . By the assumption that  $\|y - c\| \leq \frac{\eta}{4}r \leq \frac{r}{4}$ , we  
629 have that  
630

$$\begin{aligned} \mathbb{P}_x \left[ |(x - c)^\top (y - c)| > \frac{r^2}{2} \right] &\leq \mathbb{P}_{\zeta \sim \mathcal{N}(0,1)} \left( |\zeta| \geq \frac{r^2}{4\|y - c\|r} \right) \\ &\leq \exp \left( -\frac{r^2}{32\|y - c\|^2} \right) \\ &\leq \exp \left( -\frac{1}{2\eta^2} \right). \end{aligned} \quad (16)$$

631 Union bound over case (15) and case (16) gives that  $\mathbb{P}_x [\beta(y, x) > 0] \leq 2 \exp(-\frac{1}{2\eta^2})$ . This gives the  
632 bound on  $\mathbb{E}\ell(y)$ .

633 For the bound on  $\|\ell\|$ , we note from the Lipschitz assumption of  $f$  that

$$\begin{aligned} \|\ell(y)\|_2 &\leq L \cdot \frac{\gamma_r(y-x)}{\gamma_r(x-c)} \cdot \chi((x-c)^\top (y-c)). \\ &\leq L \cdot \frac{\gamma_r(y-x)}{\gamma_r(x-c)} \cdot \mathbf{1}_{|(x-c)^\top (y-c)| \leq r^2} \end{aligned}$$

634 For any  $x$  with  $|(x - c)^\top (y - c)| \leq r^2$ , we have that

$$\begin{aligned} \log \frac{\gamma_r(y-x)}{\gamma_r(x-c)} &= -\frac{1}{2r^2} \|y - x\|_2^2 + \frac{1}{2r^2} \|c - x\|_2^2 \\ &= \frac{1}{2r^2} (-2(c - x)^\top (y - c) - \|y - c\|_2^2) \\ &\leq \frac{|(x - c)^\top (y - c)|}{r^2} < 1. \end{aligned} \quad (17)$$

635 Hence, we have  $\|\ell(y)\|_2 \leq 3L$ .

636 For the bound of the Jacobian of  $\ell$ , we note that

$$\begin{aligned} D\ell(y) &= \frac{\gamma_r(y-x)}{\gamma_r(x-c)} \cdot \nabla f(x) \cdot \left( -\frac{y-x}{r^2} \right)^\top \cdot \chi((x-c)^\top (y-c)) \cdot \mathbf{1}_{\|x-c\| \leq (\sqrt{d} + \frac{1}{\eta})r} \\ &\quad + \frac{\gamma_r(y-x)}{\gamma_r(x-c)} \cdot \nabla f(x) \cdot (x-c)^\top \chi'((x-c)^\top (y-c)) \cdot \mathbf{1}_{\|x-c\| \leq (\sqrt{d} + \frac{1}{\eta})r}. \end{aligned}$$

637 Since the Lipschitz constant of  $\chi$  is bounded by  $\frac{2}{r^2}$  and the Lipschitz assumption of  $f$  is bounded by  
638  $L$ , (17) and the above equation shows that

$$\begin{aligned} \|D\ell(y)\|_{\text{op}} &\leq e \cdot L \cdot \frac{\|y - x\|_2}{r^2} \cdot \mathbf{1}_{\|x-c\| \leq (\sqrt{d} + \frac{1}{\eta})r} + e \cdot L \cdot \|x - c\|_2 \cdot \frac{2}{r^2} \cdot \mathbf{1}_{\|x-c\| \leq (\sqrt{d} + \frac{1}{\eta})r} \\ &\leq e \cdot L \cdot \frac{(\sqrt{d} + \frac{1}{\eta} + \frac{\eta}{4})r}{r^2} + 2e \cdot L \cdot \frac{(\sqrt{d} + \frac{1}{\eta})r}{r^2} \\ &\leq \frac{Lr}{r^2} + \frac{9L}{r} \cdot (\sqrt{d} + \frac{1}{\eta}) \leq \frac{20L\sqrt{d}}{r\eta}. \end{aligned}$$

639

640

641 By a concentration and  $\varepsilon$ -net argument we use Lemma 23 to prove Lemma 8. ■

642 **Proof** [Proof of Lemma 8] Fix  $y$  such that  $\|y - c\|_2 \leq \frac{\eta}{4}r$ , we let  $v(y) - \nabla g(y) = \frac{1}{N} \sum_{i=1}^N \varepsilon^{(i)}$  be  
 643 the sum of  $N$  independent vectors  $\varepsilon^{(i)}$ . Lemma 23 shows that

$$\|\mathbb{E}\varepsilon^{(i)}\|_2 \leq 2L \cdot \exp\left(-\frac{1}{2\eta^2}\right) \text{ and } \|\varepsilon^{(i)}\|_2 \leq 3L + L = 4L.$$

644 Pinelis's inequality [Pinelis, 1994] shows that

$$\mathbb{P}\left(\left\|\frac{1}{N} \sum_{i=1}^N \varepsilon^{(i)}\right\|_2 \geq 2L \cdot \exp\left(-\frac{1}{2\eta^2}\right) + 4L \cdot t\right) \leq 2 \exp\left(-\frac{Nt^2}{2}\right).$$

645 To make this holds for all  $y$  with  $\|y - c\|_2 \leq \frac{\eta}{4}r$ , we pick an  $\varepsilon$ -net  $\mathcal{N}$  on  $\{y : \|y - c\|_2 \leq \frac{\eta}{4}r\}$  with  
 646  $\varepsilon = \frac{\eta}{4}r \cdot \frac{\exp(-\frac{1}{2\eta^2})}{3\sqrt{d}}$ . It is known that  $|\mathcal{N}_\varepsilon(B_d(0, r))| \leq (\frac{3r}{\varepsilon})^d$ , therefore, using  $0 < \eta \leq 1$

$$|\mathcal{N}| \leq \left(\frac{3\frac{\eta}{4}r}{\frac{\eta}{4}r \cdot \frac{\exp(-\frac{1}{2\eta^2})}{3\sqrt{d}}}\right)^d = (9\sqrt{d})^d \exp\left(\frac{d}{2\eta^2}\right) \leq \exp\left(\frac{d \log(81d)}{\eta^2}\right).$$

647 For any  $y$  with  $\|y - c\|_2 \leq \frac{\eta}{4}r$ , there is  $y' \in \mathcal{N}$  with  $\|y' - y\|_2 \leq \varepsilon$ , therefore by Lemma 7 we have

$$\|\nabla g(y') - \nabla g(y)\| \leq \frac{L\varepsilon}{r} \leq L \cdot \exp\left(-\frac{1}{2\eta^2}\right).$$

648 Lemma 23 shows that  $\|Dv(y)\|_{\text{op}} \leq \frac{20L\sqrt{d}}{r\eta}$ . Hence, we have

$$\|v(y') - v(y)\|_2 \leq \varepsilon \cdot \frac{20L\sqrt{d}}{r\eta} \leq 2L \exp\left(-\frac{1}{2\eta^2}\right).$$

649 Taking the union bound on  $\mathcal{N}$ , we have that

$$\mathbb{P}\left(\max_{y: \|y-c\|_2 \leq \frac{\eta}{4}r} \|v(y) - \nabla g(y)\|_2 \geq 5L \cdot \exp\left(-\frac{1}{2\eta^2}\right) + 4L \cdot t\right) \leq 2 \exp\left(\frac{d \log(81d)}{\eta^2} - \frac{Nt^2}{2}\right).$$

650 Setting  $2 \exp\left(\frac{d \log(81d)}{\eta^2} - \frac{Nt^2}{2}\right) = \delta$ , we get

$$4L \cdot t \leq \frac{4L}{\sqrt{N}} \sqrt{\frac{2d \log(81d)}{\eta^2} + 2 \log \frac{2}{\delta}} \leq \frac{8L}{\sqrt{N}} \sqrt{\frac{d \log(9d)}{\eta^2} + \log \frac{1}{\delta}}$$

651 on the LHS. ■

652

### 653 D.3 Approximate Proximal Step Oracle Implementation

654 Here we prove the following theorem which bounds the performance of Algorithm 2.

655 **Theorem 24** Algorithm 2 outputs  $y$  such that  $\|\nabla g(y) + \omega(\|y - c\|) \cdot (y - c)\| \leq L \cdot \varepsilon$  in  $\mathcal{O}(\frac{p\sqrt{d}}{\varepsilon^2})$   
 656 iterations with  $N = \mathcal{O}([d \log d \log(\frac{1}{\varepsilon}) + \log(\frac{1}{\delta})]\varepsilon^{-2})$  oracle calls to  $f$  in parallel with probability at  
 657 least  $1 - \delta$  where  $\omega$  is defined by (5) with  $\tilde{r} = \frac{r}{8\sqrt{\log(\frac{60}{\varepsilon})}}$ .

658 **Proof** [Proof of Theorem 24] First, we need to prove that  $y$  stays inside  $\|y - c\|_2 \leq \tilde{r}$ . Given this,  
 659 the correctness of the output follows from the error bound on  $v$  and the stopping condition.

660 We prove  $\|y - c\|_2 \leq \tilde{r}$  by induction. Let  $y'$  be the one step from  $y$ , namely  $y' = y - h \cdot \delta_y$ . Then,  
 661 we have

$$\begin{aligned}\|y' - c\|_2 &\leq \|y - h \cdot \omega(\|y - c\|_2) \cdot (y - c) - c\|_2 + h\|v(y)\|_2 \\ &= |1 - h \cdot \omega(\|y - c\|_2)| \|y - c\|_2 + \frac{4}{3}Lh\end{aligned}$$

662 where we used the induction hypothesis  $\|y - c\|_2 \leq \tilde{r}$  and the approximation guarantee to show that  
 663  $\|v(y)\|_2 \leq \|v(y) - \nabla g(y)\|_2 + \|\nabla g(y)\|_2 \leq \frac{L\varepsilon}{6} + L \leq \frac{4}{3}L$ . Next, we note from the assumption on  
 664 step size that

$$h \cdot \omega(\|y - c\|_2) \leq h \cdot \frac{4L\tilde{r}^p}{\tilde{r}^{p+1}} \leq 1.$$

665 Hence, we have

$$\begin{aligned}\|y' - c\|_2 &\leq (1 - h \cdot \omega(\|y - c\|_2)) \|y - c\|_2 + \frac{4}{3}Lh \\ &= \|y - c\|_2 - h\omega(\|y - c\|_2)\|y - c\|_2 + \frac{4}{3}Lh.\end{aligned}$$

666 Note that  $\frac{4}{3}Lh \leq \frac{\tilde{r}}{3p}$ . Hence, if  $\|y - c\|_2 \leq \left(1 - \frac{1}{3p}\right)\tilde{r}$ , we know that  $\|y' - c\|_2 \leq \tilde{r}$ . Otherwise if  
 667  $\|y - c\|_2 \geq \left(1 - \frac{1}{3p}\right)\tilde{r}$ , we know that

$$\omega(\|y - c\|_2)\|y - c\|_2 \geq \frac{4L}{\tilde{r}^{p+1}} \left(1 - \frac{1}{3p}\right)^p \tilde{r}^{p+1} \geq \frac{4}{3}L$$

668 which implies  $\|y' - c\|_2 \leq \|y - c\|_2$ . Hence, in both cases, we have  $\|y' - c\|_2 \leq \tilde{r}$ . This completes  
 669 the induction.

670 Finally, we need to bound the number of iterations before the algorithm terminates. Let  $\mathcal{L}(y) :=$   
 671  $g(y) + \Phi(\|y - c\|_2)$  where  $\Phi$  is defined in [\(6\)](#). By Lemma [7](#), we have that

$$\nabla^2 \mathcal{L} \preceq \left(\frac{L}{r} + \frac{5L\sqrt{d}}{\tilde{r}}\right) \cdot I_d \preceq \frac{6L\sqrt{d}}{\tilde{r}} \cdot I_d$$

672 Hence, by smoothness we have

$$\mathcal{L}(y') \leq \mathcal{L}(y) - h \langle \nabla \mathcal{L}(y), \delta_y \rangle + 3\frac{L}{\tilde{r}}\sqrt{d} \cdot h^2 \|\delta_y\|^2.$$

673 Note that  $\delta_y = \nabla \mathcal{L}(y) + \eta$  for some vector  $\eta$  such that  $\|\eta\|_2 \leq L \cdot \frac{\varepsilon}{6}$  by the approximation guarantee.  
 674 Therefore

$$\begin{aligned}\mathcal{L}(y') &\leq \mathcal{L}(y) - h\|\nabla \mathcal{L}(y)\|^2 + h\|\nabla \mathcal{L}(y)\|\|\eta\| + 3\frac{L}{\tilde{r}}\sqrt{d}h^2(2\|\nabla \mathcal{L}(y)\|^2 + 2\|\eta\|^2) \\ &\leq \mathcal{L}(y) - \frac{7h}{8}\|\nabla \mathcal{L}(y)\|^2 + h\|\nabla \mathcal{L}(y)\|\|\eta\| + \frac{h}{8}\|\eta\|^2 \\ &\leq \mathcal{L}(y) - \frac{7h}{8}\|\nabla \mathcal{L}(y)\|^2 + \frac{h}{2}\|\nabla \mathcal{L}(y)\|^2 + \frac{h}{2}\|\eta\|^2 + \frac{h}{8}\|\eta\|^2 \\ &\leq \mathcal{L}(y) - \frac{7h}{8}\left(L \cdot \frac{2\varepsilon}{3}\right)^2 + \frac{5h}{8}\left(L \cdot \frac{\varepsilon}{6}\right)^2 \\ &= \mathcal{L}(y) - \frac{h}{3}L^2\varepsilon^2 = \mathcal{L}(y) - \frac{\tilde{r}L\varepsilon^2}{144p\sqrt{d}}\end{aligned}$$

675 where we used that  $\|\nabla \mathcal{L}(y)\| \geq \|\delta_y\| - \|\eta\| \geq \frac{2\varepsilon}{3}L$  from the stopping criteria. This shows that  $\mathcal{L}$   
 676 decreased by  $\frac{\tilde{r}L\varepsilon^2}{144p\sqrt{d}}$  every iteration. Since  $\mathcal{L}$  has Lipschitz constant  $L + 4L = 5L$  on  $\|y - c\| \leq \tilde{r}$ ,

$$\max_{\|y-c\| \leq \tilde{r}} \mathcal{L}(y) - \min_{\|y-c\| \leq \tilde{r}} \mathcal{L}(y) \leq 10L\tilde{r}.$$

677 Therefore the number of step is at most  $\mathcal{O}\left(\frac{p\sqrt{d}}{\varepsilon^2}\right)$  and we have

$$\|\nabla g(y) + \omega(\|y - c\|_2) \cdot (y - c)\|_2 \leq \frac{L\varepsilon}{6} + \frac{5\varepsilon}{6}L \leq L \cdot \varepsilon$$

678 as claimed. ■

679

680 The above theorem shows that we can implement (1) a noisy gradient oracle with  $\beta = \frac{L \cdot \varepsilon}{6}$ ; and (2)  
 681 an optimization oracle with  $\alpha = 0$  and  $\delta = L \cdot \varepsilon$ . Since by Theorem 24 we have  $\|y_{k+1} - \tilde{x}_k\| \leq \tilde{r}$ ,  
 682 i.e., the output of the optimization oracle is bounded in a ball of radius  $\tilde{r}$  from the center, therefore  
 683  $g_{y_{k+1}} := v(y_{k+1})$  as the vector field formed by sampling satisfies  $\|g_{y_{k+1}} - \nabla g(y_{k+1})\| \leq \frac{\delta}{6}$ ,  
 684 justifying its validity as a noisy gradient oracle at  $y_{k+1}$ .

#### 685 D.4 Parallel Complexity

686 Here we show how to put everything together to prove Theorem 3, our main highly-parallel optimiza-  
 687 tion result.

688 **Proof** [Proof of Theorem 3] Invoking the result of Section B and following the discussion in  
 689 Section D.1, with  $r = \frac{\varepsilon}{\sqrt{dL}}$ , we have  $\tilde{r} = \frac{r}{\sqrt{\log(\frac{60}{\varepsilon'})}} = \frac{\varepsilon}{L\sqrt{d\log(\frac{60}{\varepsilon'})}}$  and since

$$\omega(x) = \frac{4Lx^p}{\tilde{r}^{p+1}} = \frac{4L^{p+2}x^p[d\log(\frac{60}{\varepsilon'})]^{\frac{p+1}{2}}}{\varepsilon^{p+1}},$$

690 from Theorem 6 we have for  $\frac{\gamma_c^2}{c} = \frac{p^2}{c} \leq \frac{1}{64}$ , the convergence rate to an  $\varepsilon$ -optimal point as

$$f(y_k) - f^* = \mathcal{O}\left(\frac{\omega(\frac{\|x^*\|}{k^{3/2}})}{k^2}\|x^*\|^2\right) = \mathcal{O}\left(\frac{L^{p+2}\|x^*\|^p[d\log(\frac{1}{\varepsilon'})]^{\frac{p+1}{2}}}{\varepsilon^{p+1} \cdot k^2 \cdot k^{\frac{3p}{2}}}\|x^*\|^2\right)$$

691 with  $\mathcal{O}\left(\frac{d\log d\log(\frac{1}{\varepsilon'}) + \log(\frac{1}{\rho})}{\varepsilon'^2} \times \mathcal{K}\right)$  (sub)gradient queries to  $f$  in parallel in each round for  $\varepsilon' =$   
 692  $\mathcal{O}(\frac{\varepsilon}{\|x^*\| \cdot L})$ , as required by the accuracy for which the optimization oracle is implemented in Theo-  
 693 rem 6 and the number of proximal oracle calls the line search procedure needs where

$$\mathcal{K} \stackrel{\text{def}}{=} \left(6 + \log_2 \left[ \frac{1500\mu^3 R^3 c^2 [(1 + \alpha)c + 1]}{\varepsilon} \omega(8c\mu R) \right] \right)^2 = \mathcal{O}\left(\log^2 \left[ \frac{L^{p+2}\|x^*\|^{p+3}[d\log(\frac{1}{\varepsilon'})]^{\frac{p+1}{2}}}{\varepsilon^{p+2}} \right] \right).$$

694 Setting the result to the desired accuracy  $\varepsilon$ , we have that it suffices to pick  $k = K$  for

$$\begin{aligned} K &= \mathcal{O}\left(\left[L^{p+2} \cdot \|x^*\|^{p+2}\right]^{\frac{2}{3p+4}} \cdot \left[\frac{[d\log(\frac{\|x^*\| \cdot L}{\varepsilon})]^{\frac{p+1}{2}}}{\varepsilon^{p+2}}\right]^{\frac{2}{3p+4}}\right) \\ &= \mathcal{O}\left(\left[L^{p+2} \cdot \|x^*\|^{p+2}\right]^{\frac{2}{3p+4}} \cdot \left(\frac{d}{\varepsilon^2}\right)^{\frac{p+1}{3p+4}} \left(\frac{1}{\varepsilon}\right)^{\frac{2}{3p+4}} \cdot \left[\log\left(\frac{\|x^*\| \cdot L}{\varepsilon}\right)\right]^{\frac{p+1}{3p+4}}\right) \end{aligned}$$

695 Picking  $p$  such that  $\log(\frac{d}{\varepsilon^2}) = 3(3p + 4)$ , end up with

$$K = \mathcal{O}\left(\left(\frac{d}{\varepsilon^2}\right)^{\frac{1}{3}} \cdot \left(\frac{1}{\varepsilon}\right)^{\frac{1}{\log(d/\varepsilon^2)}} \cdot \log^{\frac{1}{3}}\left(\frac{1}{\varepsilon}\right) \cdot \left(\log\left(\frac{1}{\varepsilon}\right)\right)^{\frac{1}{\log(d/\varepsilon^2)}}$$

696 which is  $\tilde{\mathcal{O}}(d^{1/3}\varepsilon^{-2/3})$ , as claimed. Setting  $\rho = \mathcal{O}(\frac{\nu}{K})$  for the algorithm to succeed with probability  
 697 at least  $1 - \nu$ , denote  $\eta \stackrel{\text{def}}{=} \log(\frac{d}{\varepsilon^2})$  the number of parallel (sub)gradient queries is

$$\begin{aligned} &\mathcal{O}\left(\frac{d\log d\log(\frac{1}{\varepsilon}) + \log(d^{1/3}\varepsilon^{-2/3}/\nu)}{\varepsilon^2} \times \mathcal{K}\right) \\ &= \mathcal{O}\left(\frac{d\log d\log(\frac{1}{\varepsilon}) + \log(d^{1/3}\varepsilon^{-2/3}/\nu)}{\varepsilon^2} \times \log^2 \left[ \frac{[d\log(\frac{1}{\varepsilon})]^{\frac{p+1}{2}}}{\varepsilon^{p+2}} \right] \right) \\ &= \mathcal{O}\left(\frac{d\log d\log(\frac{1}{\varepsilon}) + \log(d^{1/3}\varepsilon^{-2/3}/\nu)}{\varepsilon^2} \times \log^2 \left[ \frac{[d\log(\frac{1}{\varepsilon})]^{\frac{1}{18}\eta - \frac{1}{6}}}{\varepsilon^{\frac{1}{9}\eta + \frac{2}{3}}} \right] \right) \end{aligned}$$

698 With the choice of  $p$ , it suffices to pick  $c$  large enough such that  $\frac{81c}{64} \geq (\log(\frac{d}{\varepsilon^2}) - 12)^2$  for the  
 699 assumption to hold. ■

700

## E Line Search Implementation

In this section, we assume access to an  $(\alpha, \delta)$ -approximate  $\omega$ -proximal step oracle  $\mathcal{T}_{\text{prox}}$  for a convex function  $g$ . The goal is to use  $\mathcal{T}_{\text{prox}}$  to find a point  $y$  that satisfies Lemma [16](#), as required by the algorithm framework at each iteration. In particular, below is the assumption we are making and the main theorem we are going to prove, which we recall from Appendix [B](#).

**Theorem 19 (Line Search Algorithm)** *Let  $g : \mathbb{R}^d \rightarrow \mathbb{R}$  be a twice differentiable function that is minimized at a point  $x^* \in \mathbb{R}^d$  with  $\|x^*\| \leq R$ . Further, let  $\omega : \mathbb{R}_+ \rightarrow \mathbb{R}_+$  be a continuously differentiable function where  $0 < \omega'(s) \leq \gamma \frac{\omega(s)}{s}$  for some fixed  $\gamma \geq 1$  and all  $s > 0$ . Further, let  $\mu \stackrel{\text{def}}{=} \frac{8}{\sqrt{1-\alpha}}$  and suppose*

$$\delta \leq \min \left\{ \frac{\varepsilon}{\mu \cdot R \cdot 9c[(1+\alpha)c+1]}, 8\mu R \cdot \omega(8\mu R) \right\} \text{ and } 64 \left( \alpha + \frac{1}{c} \right) \gamma^2 \leq 1 \text{ for some } c \geq 1.$$

*Then for any inputs  $x^{(1)}, x^{(2)}$  with  $\|x^{(1)}\|, \|x^{(2)}\| \leq 2\mu R$ ,  $\frac{1}{2\omega(2\mu R)} \leq A \leq \frac{R^2}{\varepsilon}$  there is an algorithm that returns  $y$  and  $\lambda$  such that  $\tilde{x} = \frac{a}{A+a}x^{(1)} + \frac{A}{A+a}x^{(2)}$  for  $a = \frac{\lambda + \sqrt{\lambda^2 + 4\lambda A}}{2}$  that either satisfies*

$$g(y) \leq g^* + \varepsilon \quad \text{and} \quad \omega(\|y - \tilde{x}\|_2) \cdot \|y - \tilde{x}\|_2 \leq c \cdot \delta$$

*or, satisfies*

$$\frac{1}{2} \leq \lambda \cdot \omega(\|y - \tilde{x}\|_2) \leq 1, \quad \omega(\|y - \tilde{x}\|_2) \cdot \|y - \tilde{x}\|_2 > c \cdot \delta,$$

*and*

$$\|\nabla g(y) + \omega(\|y - \tilde{x}\|_2) \cdot (y - \tilde{x})\| \leq \alpha \cdot \omega(\|y - \tilde{x}\|_2) \cdot \|y - \tilde{x}\|_2 + \delta$$

*after*

$$6 + \log_2 \left[ \left( \frac{160\mu R c}{\delta} + \frac{9R^2}{\varepsilon} \right) \cdot \omega(8c\mu R) \right]$$

*calls to the  $(\alpha, \delta)$ -approximate  $\omega$ -proximal step oracle  $\mathcal{T}_{\text{prox}}$  for  $g$ .*

We assume  $\delta \leq \frac{\varepsilon'}{\mu \cdot R}$  to make sure the oracle gives out information for different  $x$  (and therefore we can achieve sufficiently small error). Furthermore, assume  $\delta \leq 8\mu R \cdot \omega(8\mu R)$ . The reason is that if both  $x$  and  $y$  lie in a radius  $\mu R$  ball,  $\alpha \cdot \omega(\|y - x\|_2) \cdot \|y - x\|_2$  is bounded by  $2\mu R \cdot \omega(2\mu R)$ . So if  $\delta$  is much larger than this, the oracle essentially can always output the same  $y$  regardless of  $x$ .

### E.1 Line Search Algorithm

To simplify the notation, we define  $\tilde{x}_\theta \stackrel{\text{def}}{=} (1 - \theta)x^{(1)} + \theta x^{(2)}$ . Now, our goal is to find  $\theta$  such that

$$\frac{1}{2} \leq \zeta(\theta) \leq 1 \quad \text{where} \quad \zeta(\theta) \stackrel{\text{def}}{=} \lambda_\theta \cdot \omega(\|y_\theta - \tilde{x}_\theta\|_2) \quad (18)$$

for  $y_\theta = \mathcal{T}_{\text{prox}}(\tilde{x}_\theta)$  and  $\lambda_\theta = \frac{(1-\theta)^2 A}{\theta}$ .

First, we note that  $\zeta(0) = +\infty$  and  $\zeta(1) = 0$  (or otherwise, we find an approximate minimizer).

**Lemma 25** *We have either  $\zeta(0) = +\infty$  or  $g(x^{(1)}) \leq g(x^*) + \varepsilon'$ . Moreover, we have  $\zeta(1) = 0$ .*

**Proof** By the definition of the  $(\alpha, \delta)$  proximal oracle, we have

$$\begin{aligned} & \left\| \nabla g(\mathcal{T}_{\text{prox}}(x^{(1)})) + \omega(\|\mathcal{T}_{\text{prox}}(x^{(1)}) - x^{(1)}\|) \cdot (\mathcal{T}_{\text{prox}}(x^{(1)}) - x^{(1)}) \right\| \\ & \leq \alpha \cdot \omega(\|\mathcal{T}_{\text{prox}}(x^{(1)}) - x^{(1)}\|) \cdot \|\mathcal{T}_{\text{prox}}(x^{(1)}) - x^{(1)}\| + \delta. \end{aligned}$$

If  $\|\mathcal{T}_{\text{prox}}(x^{(1)}) - x^{(1)}\| = 0$ , we have  $\mathcal{T}_{\text{prox}}(x^{(1)}) = x^{(1)}$  and hence  $\|\nabla g(x^{(1)})\| \leq \delta$ . By convexity of  $g$ , we have that from Lemma [17](#)

$$g(x^{(1)}) \leq g(x^*) + \delta \|x^{(1)} - x^*\|_2 \leq g(x^*) + \mu \delta R \leq g(x^*) + \varepsilon'.$$

728 where we used  $\delta \leq \frac{\varepsilon'}{\mu \cdot R}$  at the end. Otherwise, we have  $\|\mathcal{T}_{\text{prox}}(x^{(1)}) - x^{(1)}\| > 0$  therefore  
 729  $\zeta(0) = +\infty$  and  $\zeta(1) = 0$  from the definition. ■

730

731 Therefore, to find  $\theta$  such that  $\zeta(\theta) = \frac{3}{4}$ , we can simply perform binary search. In particular, in  
 732  $\log_2(\frac{1}{\tau})$  iterations, we can find  $0 \leq \ell \leq u \leq 1$  with  $|\ell - u| \leq \tau$  such that  $\zeta(\ell) - \frac{3}{4}$  and  $\zeta(u) - \frac{3}{4}$   
 733 have different signs. See Algorithm 4 for the algorithm details. The key question is how small  $\tau$  we  
 734 need to make sure  $\frac{1}{2} \leq \zeta(\frac{\ell+u}{2}) \leq 1$ .

735 The difficulty here is that  $\zeta$  may not be continuous. Therefore, we cannot bound the Lipschitz  
 736 constant of  $\zeta$  directly. Different from previous papers [Bubeck et al., 2018], our proof does not  
 737 depend on how we implement the proximal oracle  $\mathcal{T}_{\text{prox}}$  and do not assume how  $\mathcal{T}_{\text{prox}}(x)$  changes  
 738 with respect to  $x$ . In fact, the oracle  $\mathcal{T}_{\text{prox}}$  we constructed in Section D may not even give the same  
 739 output for the same input. Therefore, it is difficult to bound how far  $\mathcal{T}_{\text{prox}}(x)$  changes under the  
 740 change of  $\lambda$ . To avoid this problem, we first relate the noisy oracle  $\mathcal{T}_{\text{prox}}$  with the ideal oracle with  
 741  $\alpha = \delta = 0$ . We note that the ideal oracle is exactly performing a proximal step as follows:

742 **Lemma 26 (Exact Proximal Map)** *Given  $x$ , let  $y^* := \mathcal{O}(x) := \arg \min_y G(y)$  where*

$$G(y) \stackrel{\text{def}}{=} g(y) + W(\|y - x\|_2) \quad \text{with} \quad W(s) \stackrel{\text{def}}{=} \int_0^s \omega(u) \cdot u \, du$$

743 *then  $\mathcal{O}$  is a  $(0, 0)$  proximal oracle for  $g$ . Furthermore,  $G$  is strictly convex with  $\nabla^2 G(y) \succeq \omega(\|y -$   
 744  $x\|_2) \cdot I$  for any  $x$ .*

745 **Proof** From the optimality condition we have for  $y^* = \mathcal{O}(x)$

$$\nabla G(y^*) = \nabla g(y^*) + \omega(\|y^* - x\|_2) \cdot (y^* - x) = 0.$$

746 which means  $\mathcal{O}$  is a  $(0, 0)$  proximal oracle according to the definition. Note that

$$\begin{aligned} \nabla^2 G(y) &= \nabla^2 g(y) + \omega(\|y - x\|_2)I + \omega'(\|y - x\|_2) \cdot \frac{(y - x)(y - x)^\top}{\|y - x\|_2} \\ &\succeq \omega(\|y - x\|_2)I \end{aligned}$$

747 where we used  $g$  is convex and  $\omega$  is increasing. Since  $G$  is strictly convex, this shows that  $y^*$  is the  
 748 unique minimizer of  $G$ . ■

749

750 In Section E.2 we show that  $\zeta$  is close to some continuous function  $\zeta^*$  (except for some cases that  
 751 we can handle separately).

## 752 E.2 Line Search Regime: Relation between Exact and Inexact Proximal Map

753 The goal of this section is to relate

$$\zeta(\theta) \stackrel{\text{def}}{=} \frac{(1 - \theta)^2 A}{\theta} \omega(\|y_\theta - \tilde{x}_\theta\|_2)$$

754 for  $y_\theta = \mathcal{T}_{\text{prox}}(\tilde{x}_\theta)$  is output of an  $(\alpha, \delta)$  proximal oracle to

$$\zeta^*(\theta) = \frac{(1 - \theta)^2 A}{\theta} \omega(\|y_\theta^* - \tilde{x}_\theta\|_2)$$

755 where  $y_\theta^* = \arg \min_y G_\theta(y)$  with

$$G_\theta(y) = g(y) + W(\|y - \tilde{x}_\theta\|_2), \tag{19}$$

756 the exact proximal map. In particular, we will show in Lemma 28 that  $\zeta(\theta)$  is an constant approxima-  
 757 tion of  $\zeta^*(\theta)$ . Therefore, one can study the binary search of  $\zeta$  via  $\zeta^*$ .

758 First we give a lemma that relates  $\|y_\theta - \tilde{x}_\theta\|_2$  and  $\|y_\theta^* - \tilde{x}_\theta\|_2$ .



---

**Algorithm 4: Line Search Algorithm**


---

```

1 Input:  $x^{(1)}, x^{(2)} \in \mathbb{R}^d$  and  $\frac{1}{2\omega(2\mu R)} \leq A \leq \frac{R^2}{\varepsilon}$ .
2 Input:  $\varepsilon' = \frac{\varepsilon}{9c((1+\alpha)c+1)} \in (0, 1]$ .
3 Input: an  $(\alpha, \delta)$  proximal oracle  $\mathcal{T}_{\text{prox}}$  for a convex twice-differentiable function  $g$ .
4 Assumption:  $\|x^{(1)}\|_2 \leq 2\mu R$ ,  $\|x^{(2)}\|_2 \leq 2\mu R$ ,  $\|x^*\|_2 \leq R$  for some minimizer  $x^*$  of  $g$ .
5 Assumption:  $\delta \leq \min\{\frac{\varepsilon'}{\mu \cdot R}, 8\mu R \cdot \omega(8\mu R)\}$ .  $0 < \omega'(s) \leq \gamma \frac{\omega(s)}{s}$  for all  $s > 0$ .  $\frac{1-\sigma}{1-\alpha} = \frac{1}{2}$ .
    $64(\alpha + \frac{1}{c})\gamma^2 \leq 1$  for some  $c \geq 1$ .
6 Define  $\tilde{x}_\theta = (1-\theta)x^{(1)} + \theta x^{(2)}$ ,  $y_\theta = \mathcal{T}_{\text{prox}}(\tilde{x}_\theta)$  and  $\zeta(\theta)$  according to (18).
7 Let  $\tau = \min\left\{\frac{1}{4}, \frac{1}{2}\sqrt{\frac{1}{4} \frac{1}{A \cdot \omega(8c\mu R)}}, \frac{A\delta}{64\mu R}, \frac{c\delta}{360\mu\gamma R \cdot \omega(8c\mu R)}, \frac{1}{200(1+A \cdot \omega(8c\mu R) + \frac{4\mu R}{A\delta} + \frac{\mu R}{\delta} \cdot \omega(8c\mu R))}\right\}$ .
8 Set  $\ell = 0$ ,  $u = 1$ .
9 while  $u \geq \ell + \tau$  do
10    $m = \frac{\ell+u}{2}$ .
11   if  $\zeta(m) \geq \frac{3}{4}$  then
12      $\ell \leftarrow m$ .
13   else
14      $u \leftarrow m$ .
15   end
16 end
17 if  $\omega(\|y_\ell - \tilde{x}_\ell\|_2) \cdot \|y_\ell - \tilde{x}_\ell\|_2 \leq c \cdot \delta$  then
18   Return  $y_\ell$  as an approximate minimizer.
19 else if  $\omega(\|y_u - \tilde{x}_u\|_2) \cdot \|y_u - \tilde{x}_u\|_2 \leq c \cdot \delta$  then
20   Return  $y_u$  as an approximate minimizer.
21 else
22   Return  $y_\ell$  as an approximate solution for the line search.
23 end

```

---

759 **Lemma 27** Assume that  $8(\alpha + \frac{1}{c})\gamma \leq 1$ . If  $\omega(\|y_\theta - \tilde{x}_\theta\|_2) \cdot \|y_\theta - \tilde{x}_\theta\|_2 \geq c \cdot \delta$ , then

$$\left(1 - 8\left(\alpha + \frac{1}{c}\right)\gamma\right) \|y_\theta - \tilde{x}_\theta\|_2 \leq \|y_\theta^* - \tilde{x}_\theta\|_2 \leq \left(1 + 8\left(\alpha + \frac{1}{c}\right)\gamma\right) \|y_\theta - \tilde{x}_\theta\|_2.$$

760 **Proof** We define  $y_\theta^{(t)} = (1-t)y_\theta + ty_\theta^*$ . Then, we have that

$$\nabla G_\theta(y_\theta^*) - \nabla G_\theta(y_\theta) = \int_0^1 \nabla^2 G_\theta(y_\theta^{(t)}) \cdot (y_\theta^* - y_\theta) dt. \quad (20)$$

761 Lemma 26 shows that

$$\nabla^2 G_\theta(y_\theta^{(t)}) \succeq \omega(\|y_\theta^{(t)} - \tilde{x}_\theta\|_2) \cdot I. \quad (21)$$

762 To lower bound  $\|y_\theta^{(t)} - \tilde{x}_\theta\|_2$ , we split the proof into two cases:

763 Case 1:  $\|y_\theta - y_\theta^*\|_2 \geq 4\|y_\theta - \tilde{x}_\theta\|_2$ . Since  $y_\theta^{(t)} = (1-t)y_\theta + ty_\theta^*$ , then for  $t \geq \frac{1}{2}$ ,

$$\begin{aligned} \|y_\theta^{(t)} - \tilde{x}_\theta\|_2 &= \|y_\theta - \tilde{x}_\theta + t(y_\theta^* - y_\theta)\|_2 \\ &\geq t\|y_\theta^* - y_\theta\|_2 - \|y_\theta - \tilde{x}_\theta\|_2 \\ &\geq \|y_\theta - \tilde{x}_\theta\|_2. \end{aligned}$$

764 Since  $\omega$  is increasing, we have  $\omega(\|y_\theta^{(t)} - \tilde{x}_\theta\|_2) \geq \omega(\|y_\theta - \tilde{x}_\theta\|_2)$ . Together with (20) and (21), we have that

$$\begin{aligned} \|\nabla G_\theta(y_\theta) - \nabla G_\theta(y_\theta^*)\|_2 &\geq \int_{1/2}^1 \omega(\|y_\theta - \tilde{x}_\theta\|_2) dt \cdot \|y_\theta - y_\theta^*\|_2 \\ &= \frac{1}{2} \omega(\|y_\theta - \tilde{x}_\theta\|_2) \cdot \|y_\theta - y_\theta^*\|_2. \end{aligned}$$

766 Case 2:  $\|y_\theta - y_\theta^*\|_2 \leq 4\|y_\theta - \tilde{x}_\theta\|_2$ . Since  $y_\theta^{(t)} = (1-t)y_\theta + ty_\theta^*$ , we have

$$\|y_\theta^{(t)} - \tilde{x}_\theta\|_2 \geq \|y_\theta - \tilde{x}_\theta\|_2 - t\|y_\theta^* - y_\theta\|_2 \geq (1-4t)\|y_\theta - \tilde{x}_\theta\|_2.$$

767 Using this and  $\omega(\eta \cdot \beta) \leq \eta^\gamma \omega(\beta)$  (which is implied by  $\omega'(s) \leq \gamma \frac{\omega(s)}{s}$  from Grönwall's inequality),  
768 for  $0 \leq t \leq \frac{1}{4}$ , we have that

$$\omega(\|y_\theta^{(t)} - \tilde{x}_\theta\|_2) \geq (1-4t)^\gamma \omega(\|y_\theta - \tilde{x}_\theta\|_2).$$

769 Together with (20) and (21), we have that

$$\begin{aligned} \|\nabla G_\theta(y_\theta) - \nabla G_\theta(y_\theta^*)\|_2 &\geq \int_0^{1/4} (1-4t)^\gamma dt \cdot \omega(\|y_\theta - \tilde{x}_\theta\|_2) \cdot \|y_\theta - y_\theta^*\|_2 \\ &= \frac{1}{4(\gamma+1)} \cdot \omega(\|y_\theta - \tilde{x}_\theta\|_2) \cdot \|y_\theta - y_\theta^*\|_2. \end{aligned} \quad (22)$$

770 In both cases, we have (22) as  $\gamma \geq 1$ .

771 On the other hand, the assumption on  $y_\theta$  shows that

$$\begin{aligned} \|\nabla G_\theta(y_\theta) - \nabla G_\theta(y_\theta^*)\|_2 &= \|\nabla G_\theta(y_\theta)\|_2 \leq \alpha \cdot \omega(\|y_\theta - \tilde{x}_\theta\|_2) \cdot \|y_\theta - \tilde{x}_\theta\|_2 + \delta \\ &\leq (\alpha + \frac{1}{c}) \cdot \omega(\|y_\theta - \tilde{x}_\theta\|_2) \cdot \|y_\theta - \tilde{x}_\theta\|_2 \end{aligned} \quad (23)$$

772 where we used the assumption on  $\omega(\|y_\theta - \tilde{x}_\theta\|_2) \cdot \|y_\theta - \tilde{x}_\theta\|_2$ .

773 Combining (22) and (23), we have that

$$\|y_\theta - y_\theta^*\|_2 \leq 4(\alpha + \frac{1}{c})(\gamma+1) \cdot \|y_\theta - \tilde{x}_\theta\|_2 \leq 8(\alpha + \frac{1}{c})\gamma \cdot \|y_\theta - \tilde{x}_\theta\|_2$$

774 where we used that  $\gamma \geq 1$ . The claim now follows from triangle inequality. ■

775

776 Since  $\zeta$  is only a function of  $\|y_\theta - \tilde{x}_\theta\|_2$ , we have the following main result of this section:

777 **Lemma 28** *If  $64(\alpha + \frac{1}{c})\gamma^2 \leq 1$  and  $\omega(\|y_\theta - \tilde{x}_\theta\|_2) \cdot \|y_\theta - \tilde{x}_\theta\|_2 \geq c \cdot \delta$ , then  $\frac{7}{8}\zeta(\theta) \leq \zeta^*(\theta) \leq \frac{5}{4}\zeta(\theta)$ .*

778 **Proof** Lemma 27 shows that

$$(1 - 8(\alpha + \frac{1}{c})\gamma)\|y_\theta - \tilde{x}_\theta\|_2 \leq \|y_\theta^* - \tilde{x}_\theta\|_2 \leq (1 + 8(\alpha + \frac{1}{c})\gamma)\|y_\theta - \tilde{x}_\theta\|_2.$$

779 Using  $\omega$  is non-decreasing and  $\omega(\eta \cdot \beta) \leq \eta^\gamma \omega(\beta)$ , we have

$$(1 - 8(\alpha + \frac{1}{c})\gamma)^\gamma \omega(\|y_\theta - \tilde{x}_\theta\|_2) \leq \omega(\|y_\theta^* - \tilde{x}_\theta\|_2) \leq (1 + 8(\alpha + \frac{1}{c})\gamma)^\gamma \omega(\|y_\theta - \tilde{x}_\theta\|_2).$$

780 The result now follows from the assumption  $64(\alpha + \frac{1}{c})\gamma^2 \leq 1$ . ■

781

### 782 E.3 Approximate Minimization Regime: when $y_\theta$ is close to $\tilde{x}_\theta$

783 In Section E.2 we show that if  $\|y_\theta - \tilde{x}_\theta\|_2$  is large,  $\zeta$  approximates  $\zeta^*$  up to constant factor. In this  
784 section, we handle the other case. We show that if  $\|y_\theta - \tilde{x}_\theta\|_2$  is small, then we can find a  $y$  with  
785 small function value  $g(y)$ . First, we show that  $\|y_\theta - \tilde{x}_\theta\|_2$  cannot be too large.

786 **Lemma 29** *Assume that  $16(\alpha + \frac{1}{c})\gamma \leq 1$ . We have*

$$\|y_\theta - \tilde{x}_\theta\|_2 \leq 8c\mu R$$

787 for all  $\theta \in [0, 1]$ .

788 **Proof** Case 1:  $\omega(\|y_\theta - \tilde{x}_\theta\|_2) \cdot \|y_\theta - \tilde{x}_\theta\|_2 \geq c \cdot \delta$ . Using this and  $16(\alpha + \frac{1}{c})\gamma \leq 1$ , Lemma 27  
 789 shows that

$$\|y_\theta - \tilde{x}_\theta\|_2 \leq 2\|y_\theta^* - \tilde{x}_\theta\|_2. \quad (24)$$

790 To upper bound  $\|y_\theta^* - \tilde{x}_\theta\|_2$ , we use the fact that  $y_\theta^*$  is the minimizer of  $G_\theta$  and get

$$g(x^*) + W(\|x^* - \tilde{x}_\theta\|_2) = G_\theta(x^*) \geq G_\theta(y_\theta^*) \geq g(x^*) + W(\|y_\theta^* - \tilde{x}_\theta\|_2).$$

791 Since  $W$  is increasing, we have  $\|y_\theta^* - \tilde{x}_\theta\|_2 \leq \|x^* - \tilde{x}_\theta\|_2 \leq \mu R$  where we used Lemma 17. Putting  
 792 it into (24) gives the result.

793 Case 2:  $\omega(\|y_\theta - \tilde{x}_\theta\|_2) \cdot \|y_\theta - \tilde{x}_\theta\|_2 \leq c \cdot \delta$ . Since  $\delta \leq 8\mu R \cdot \omega(8\mu R)$  and that  $\omega$  is increasing, we  
 794 have that

$$\|y_\theta - \tilde{x}_\theta\|_2 \leq 8c\mu R.$$

795 Therefore in both cases we have  $\|y_\theta - \tilde{x}_\theta\|_2 \leq 8c\mu R$  as  $c \geq 1$ . ■

796

797 Now, we show that small  $\|y_\theta - \tilde{x}_\theta\|_2$  implies small  $g(y_\theta)$ .

798 **Lemma 30** *If  $\omega(\|y_\theta - \tilde{x}_\theta\|_2) \cdot \|y_\theta - \tilde{x}_\theta\|_2 \leq c \cdot \delta$ , we have that*

$$g(y_\theta) \leq g(x^*) + \varepsilon.$$

799 **Proof** By the definition of  $y_\theta$  and the assumption, we have

$$\|\nabla g(y_\theta)\|_2 \leq (1 + \alpha)\omega(\|y_\theta - \tilde{x}_\theta\|_2) \cdot \|y_\theta - \tilde{x}_\theta\|_2 + \delta \leq ((1 + \alpha)c + 1)\delta \quad (25)$$

800 Hence, convexity of  $g$  shows that

$$g(y_\theta) - g(x^*) \leq \langle \nabla g(y_\theta), y_\theta - x^* \rangle \leq ((1 + \alpha)c + 1)\delta \|y_\theta - x^*\|_2.$$

801 To bound  $\|y_\theta - x^*\|_2$ , we note that

$$\|y_\theta - x^*\|_2 \leq \|\tilde{x}_\theta - x^*\|_2 + \|y_\theta - \tilde{x}_\theta\|_2 \leq \mu R + 8c\mu R \leq 9c\mu R$$

802 where we used Lemma 29 and Lemma 17. Hence, convexity of  $g$  shows that

$$g(y_\theta) - g(x^*) \leq \langle \nabla g(y_\theta), y_\theta - x^* \rangle \leq ((1 + \alpha)c + 1)\delta \cdot 9c\mu R \leq 9c((1 + \alpha)c + 1)\varepsilon'.$$

803 where we used  $\delta \leq \frac{\varepsilon'}{\mu \cdot R}$ . ■

804

#### 805 E.4 Bounding Lipschitz constant of $\zeta^*(\theta)$

806 To derive the stopping criteria  $\tau$  (and therefore the iteration complexity), we need to bound the  
 807 Lipschitz constant of  $\zeta^*(\theta)$ . We first give an upper bound on  $\|\frac{d}{d\theta}(y_\theta^* - \tilde{x}_\theta)\|$ .

808 **Lemma 31** *We have:*

$$\left\| \frac{d}{d\theta}(y_\theta^* - \tilde{x}_\theta) \right\| \leq 12\mu\gamma R.$$

809 **Proof** To compute the derivative of  $y_\theta$ , we note by optimality condition that

$$\nabla G_\theta(y_\theta^*) = 0.$$

810 Taking derivatives with respect to  $\theta$  on both sides gives

$$\frac{d}{d\theta} \nabla G_\theta(y_\theta^*) + \nabla^2 G_\theta(y_\theta^*) \cdot \frac{d}{d\theta} y_\theta^* = 0.$$

811 Hence, we have

$$\frac{d}{d\theta} y_\theta^* = -(\nabla^2 G_\theta(y_\theta^*))^{-1} \left( \frac{d}{d\theta} \nabla G_\theta(y_\theta^*) \right). \quad (26)$$

812 To bound  $\frac{d}{d\theta} y_\theta^*$ , we first compute  $\frac{d}{d\theta} \nabla G_\theta(y)$  and  $\nabla^2 G_\theta(y)$ . For  $\frac{d}{d\theta} \nabla G_\theta(y)$ , we have

$$\begin{aligned} \frac{d}{d\theta} \nabla G_\theta(y) &= \frac{d}{d\theta} [\omega(\|y - \tilde{x}_\theta\|_2) \cdot (y - \tilde{x}_\theta)] \\ &= -\omega'(\|y - \tilde{x}_\theta\|_2) \cdot \frac{(y - \tilde{x}_\theta)(y - \tilde{x}_\theta)^\top}{\|y - \tilde{x}_\theta\|_2} (x^{(2)} - x^{(1)}) - \omega(\|y - \tilde{x}_\theta\|_2) \cdot (x^{(2)} - x^{(1)}). \end{aligned}$$

813 For  $\nabla^2 G_\theta(y)$ , Lemma 26 shows that

$$\nabla^2 G_\theta(y) \succeq \omega(\|y - \tilde{x}_\theta\|_2) \cdot I.$$

814 Now, (26) shows

$$\begin{aligned} \left\| \frac{d}{d\theta} y_\theta^* \right\| &\leq \left[ \frac{\omega'(\|y_\theta^* - \tilde{x}_\theta\|_2)}{\omega(\|y_\theta^* - \tilde{x}_\theta\|_2)} \cdot \left| (y_\theta^* - \tilde{x}_\theta)^\top (x^{(2)} - x^{(1)}) \right| + \|x^{(2)} - x^{(1)}\|_2 \right] \\ &\leq \frac{\omega'(\|y_\theta^* - \tilde{x}_\theta\|_2)}{\omega(\|y_\theta^* - \tilde{x}_\theta\|_2)} \cdot \|y_\theta^* - \tilde{x}_\theta\| \cdot \|x^{(2)} - x^{(1)}\| + \|x^{(2)} - x^{(1)}\|_2 \\ &\leq (1 + \gamma) \cdot \|x^{(2)} - x^{(1)}\|_2 \end{aligned}$$

815 where we used that  $\omega'(s) \leq \gamma \cdot \frac{\omega(s)}{s}$  at the end. Hence, we have

$$\left\| \frac{d}{d\theta} (y_\theta^* - \tilde{x}_\theta) \right\| \leq \left\| \frac{d}{d\theta} y_\theta^* \right\| + \|x^{(2)} - x^{(1)}\| \leq (2 + \gamma) \|x^{(2)} - x^{(1)}\|_2.$$

816 The result follows from  $\gamma \geq 1$  and  $\|x^{(2)} - x^{(1)}\|_2 \leq 4\mu R$ . ■

817

818 We now give a bound on the Lipschitz constant  $\zeta^*(\theta)$ .

819 **Lemma 32** *We have*

$$\left| \frac{d}{d\theta} \log \zeta^*(\theta) \right| \leq \frac{2}{1-\theta} + \frac{1}{\theta} + \frac{12\mu\gamma^2 R}{\|y_\theta^* - \tilde{x}_\theta\|_2}.$$

820 **Proof** Note that

$$\frac{d}{d\theta} \log \zeta^*(\theta) = -\frac{2}{1-\theta} - \frac{1}{\theta} + \frac{\omega'(\|y_\theta^* - \tilde{x}_\theta\|_2)}{\omega(\|y_\theta^* - \tilde{x}_\theta\|_2)} \frac{(y_\theta^* - \tilde{x}_\theta)^\top \frac{d}{d\theta} (y_\theta^* - \tilde{x}_\theta)}{\|y_\theta^* - \tilde{x}_\theta\|_2}.$$

821 Using  $\omega'(s) \leq \gamma \cdot \frac{\omega(s)}{s}$ , we have

$$\begin{aligned} \left| \frac{d}{d\theta} \log \zeta^*(\theta) \right| &\leq \frac{2}{1-\theta} + \frac{1}{\theta} + \gamma \frac{|(y_\theta^* - \tilde{x}_\theta)^\top \frac{d}{d\theta} (y_\theta^* - \tilde{x}_\theta)|}{\|y_\theta^* - \tilde{x}_\theta\|_2^2} \\ &\leq \frac{2}{1-\theta} + \frac{1}{\theta} + \gamma \frac{\left\| \frac{d}{d\theta} (y_\theta^* - \tilde{x}_\theta) \right\|_2}{\|y_\theta^* - \tilde{x}_\theta\|_2} \\ &\leq \frac{2}{1-\theta} + \frac{1}{\theta} + \frac{12\mu\gamma^2 R}{\|y_\theta^* - \tilde{x}_\theta\|_2} \end{aligned}$$

822 from Lemma 31. ■

823

824 Since the Lipschitz constant of  $\zeta^*$  depends on the term  $\frac{1}{1-\theta}$  and  $\frac{1}{\theta}$ , we need to show that  $\theta$  cannot be  
825 too close to 0 and 1. First, we give an upper bound  $\theta$ .

826 **Lemma 33 (Upper bound on  $\theta$ )** *Assume that  $16(\alpha + \frac{1}{c})\gamma \leq 1$ . For any  $\theta \in [0, 1]$  with  $\frac{1}{2} \leq \zeta(\theta)$ ,  
827 we have*

$$\theta \leq \max \left( \frac{1}{2}, 1 - \sqrt{\frac{1}{4} \frac{1}{A \cdot \omega(8c\mu R)}} \right)$$

828 *In particular, we have  $u \leq \max \left( \frac{3}{4}, 1 - \frac{1}{2} \sqrt{\frac{1}{4} \frac{1}{A \cdot \omega(8c\mu R)}} \right)$ .*

829 **Proof** Suppose that  $\theta \geq \frac{1}{2}$ , then we have

$$\frac{1}{2} \leq \zeta(\theta) = \frac{(1-\theta)^2 A}{\theta} \omega(\|y_\theta - \tilde{x}_\theta\|_2) \leq 2(1-\theta)^2 A \omega(\|y_\theta - \tilde{x}_\theta\|_2).$$

830 The bound on  $\theta$  now follows from Lemma 29. Since we stop the binary search when  $|u - \ell|$  less than

831  $\frac{1}{2} \min\left(\frac{1}{2}, \sqrt{\frac{1}{4 A \cdot \omega(8c\mu R)}}\right)$ , we have the upper bound on  $u$ . ■

832 Next, we give a lower bound on  $\theta$ .

833 **Lemma 34 (Lower bound on  $\theta$ )** Assume  $16(\alpha + \frac{1}{c})\gamma \leq 1$ . For any  $\theta \in [0, 1]$  with  $\zeta(\theta) \leq 1$  and  
834  $\omega(\|y_\theta - \tilde{x}_\theta\|_2) \cdot \|y_\theta - \tilde{x}_\theta\|_2 \geq c \cdot \delta$ , we have

$$\theta \geq \min\left(\frac{1}{2}, \frac{A\delta}{32\mu R}\right).$$

835 In particular, we have  $\ell \geq \min\left(\frac{1}{4}, \frac{A\delta}{64\mu R}\right)$  or  $\omega(\|y_\theta - \tilde{x}_\theta\|_2) \cdot \|y_\theta - \tilde{x}_\theta\|_2 \leq c \cdot \delta$ .

836 **Proof** Suppose that  $\theta \leq \frac{1}{2}$ , then we have from the assumption

$$\begin{aligned} 1 &\geq \zeta(\theta) = \frac{(1-\theta)^2 A}{\theta} \omega(\|y_\theta - \tilde{x}_\theta\|_2) \\ &\geq \frac{1}{4} \cdot \frac{A}{\theta} \omega(\|y_\theta - \tilde{x}_\theta\|_2) \\ &\geq \frac{1}{4} \cdot \frac{A}{\theta} \frac{c\delta}{\|y_\theta - \tilde{x}_\theta\|_2} \\ &\geq \frac{1}{4} \cdot \frac{A}{\theta} \frac{c\delta}{8c\mu R} \end{aligned}$$

837 where we used Lemma 29. This gives the lower bound on  $\theta$ . Since we stop the binary search when  
838  $|u - \ell|$  less than  $\frac{1}{2} \min\left(\frac{1}{2}, \frac{A\delta}{32\mu R}\right)$ , we have the lower bound on  $\ell$ . ■

839

840 Now, we are ready to show the correctness of Algorithm 4 with the assumed  $\tau$ .

841 **Theorem 35 (Correctness of Algorithm)** Assume  $64(\alpha + \frac{1}{c})\gamma^2 \leq 1$ . Algorithm 4 outputs either  $y$   
842 such that

$$g(y) \leq g^* + \varepsilon$$

843 or  $y = y_\theta$  such that

$$\frac{1}{2} \leq \zeta(\theta) \leq 1$$

844 with

$$\|\nabla g(y_\theta) + \omega(\|y_\theta - \tilde{x}_\theta\|_2) \cdot (y_\theta - \tilde{x}_\theta)\| \leq \alpha \cdot \omega(\|y_\theta - \tilde{x}_\theta\|_2) \cdot \|y_\theta - \tilde{x}_\theta\|_2 + \delta$$

845 where  $\delta \leq \frac{1}{c} \omega(\|y_\theta - \tilde{x}_\theta\|_2) \cdot \|y_\theta - \tilde{x}_\theta\|_2$ .

846 **Proof** For the case  $\omega(\|y_\ell - \tilde{x}_\ell\|_2) \cdot \|y_\ell - \tilde{x}_\ell\|_2 \leq c \cdot \delta$  and  $\omega(\|y_u - \tilde{x}_u\|_2) \cdot \|y_u - \tilde{x}_u\|_2 \leq c \cdot \delta$ ,  
847 Lemma 30 shows that  $g(y) \leq g^* + \varepsilon$ .

848 Otherwise, Lemma 33 and Lemma 34 show that

$$\ell \geq \min\left\{\frac{1}{4}, \frac{A\delta}{64\mu R}\right\} \quad (27)$$

849 and

$$u \leq \max\left\{\frac{3}{4}, 1 - \frac{1}{2} \sqrt{\frac{1}{4 A \cdot \omega(8c\mu R)}}\right\}. \quad (28)$$

Therefore, together with Lemma 32 we have

$$\begin{aligned} \left| \frac{d}{d\theta} \log \zeta^*(\theta) \right| &\leq \frac{2}{1-\theta} + \frac{1}{\theta} + \frac{12\mu\gamma^2 R}{\|y_\theta^* - \tilde{x}_\theta\|_2} \\ &\leq 12 + 4\sqrt{4A \cdot \omega(8c\mu R)} + \frac{64\mu R}{A\delta} + \frac{12\mu\gamma^2 R}{\|y_\theta^* - \tilde{x}_\theta\|_2} \end{aligned} \quad (29)$$

for all  $\ell \leq \theta \leq u$ . To bound the term  $\|y_\theta^* - \tilde{x}_\theta\|_2$ , note from Lemma 28 we have

$$\frac{8}{7} \|y_u^* - \tilde{x}_u\|_2 \geq \|y_u - \tilde{x}_u\|_2 \geq \frac{c\delta}{\omega(\|y_u - \tilde{x}_u\|_2)}. \quad (30)$$

Using  $\frac{3}{4} \geq \zeta(u)$  (due to binary search), we have

$$\frac{3}{4} \geq \zeta(u) = \frac{(1-u)^2 A}{u} \omega(\|y_u - \tilde{x}_u\|_2) \geq (1-u)^2 A \omega(\|y_u - \tilde{x}_u\|_2).$$

Putting it into (30) gives

$$\|y_u^* - \tilde{x}_u\|_2 \geq \frac{28c\delta(1-u)^2 A}{24} \geq \frac{7c\delta A}{6} \frac{1}{16A \cdot \omega(8c\mu R)} \geq \frac{c\delta}{15 \cdot \omega(8c\mu R)}$$

where we used (28) for the last inequality. Lemma 31 shows that

$$\left\| \frac{d}{d\theta} (y_\theta^* - \tilde{x}_\theta) \right\| \leq 12\mu\gamma R.$$

Since we have from the stopping criteria  $\tau = |u - \ell| \leq \frac{c\delta}{360\mu\gamma R \cdot \omega(8c\mu R)}$ , for all  $\ell \leq \theta \leq u$ , this gives

$$\|y_\theta^* - \tilde{x}_\theta\|_2 \geq \|y_u^* - \tilde{x}_u\|_2 - 12\mu\gamma R \cdot \tau \geq \frac{c\delta}{30\omega(8c\mu R)}.$$

Put together with (29) we have

$$\begin{aligned} \left| \frac{d}{d\theta} \log \zeta^*(\theta) \right| &\leq 12 + 8\sqrt{A \cdot \omega(8c\mu R)} + \frac{64\mu R}{A\delta} + \frac{360\mu\gamma^2 R \omega(8c\mu R)}{c\delta} \\ &\leq 20 + 20A \cdot \omega(8c\mu R) + \frac{64\mu R}{A\delta} + \frac{6\mu R \omega(8c\mu R)}{\delta} \\ &\leq 20 \left( 1 + A \cdot \omega(8c\mu R) + \frac{4\mu R}{A\delta} + \frac{\mu R}{\delta} \cdot \omega(8c\mu R) \right) \end{aligned}$$

where we used  $64(\alpha + \frac{1}{c})\gamma^2 \leq 1$  and  $\alpha \leq 1$ . Due to the choice of  $\tau \leq \frac{1}{200(1+A \cdot \omega(8c\mu R) + \frac{4\mu R}{A\delta} + \frac{\mu R}{\delta} \cdot \omega(8c\mu R))}$ , this shows that  $\zeta^*(\ell) \leq e^{\frac{1}{10}} \zeta^*(u)$ . Now, using Lemma 28, we have

$$\zeta(\ell) \leq \frac{8}{7} \zeta^*(\ell) \leq \frac{8}{7} e^{\frac{1}{10}} \zeta^*(u) \leq \frac{8}{7} e^{\frac{1}{10}} \frac{5}{4} \cdot \zeta(u) \leq \frac{8}{7} e^{\frac{1}{10}} \frac{5}{4} \frac{3}{4} \leq 1.$$

Moreover, by the definition of binary search, we know  $\zeta(\ell) \geq \frac{3}{4}$ . This completes the proof that we have found a point satisfying  $\frac{1}{2} \leq \zeta(\theta) \leq 1$ . ■

## E.5 Bounding the number of steps

To bound the number of steps, we need to have a lower and upper bound on  $A$ . We note that when we apply the line search procedure, we have  $A = A_k$  at iteration  $k$ . Furthermore, we assume  $k \geq 1$  because no line search is needed for  $k = 0$ . Under the assumption, we have  $\frac{1}{2\omega(2\mu R)} \leq A \leq \frac{R^2}{\varepsilon}$ . Below we give the proof of the main theorem for the line search implementation.

868 **Proof** [Proof of Theorem 19] Recall from the algorithm description, we set

$$\begin{aligned} \frac{1}{\tau} &\leq 4 + 2\sqrt{4A \cdot \omega(8c\mu R)} + \frac{64\mu R}{A\delta} + \frac{360\mu\gamma R \cdot \omega(8c\mu R)}{c\delta} \\ &\quad + 200 \left( 1 + A \cdot \omega(8c\mu R) + \frac{4\mu R}{A\delta} + \frac{\mu R}{\delta} \cdot \omega(8c\mu R) \right) \\ &\leq 300 \left( 1 + A \cdot \omega(8c\mu R) + \frac{4\mu R}{A\delta} + \frac{\mu R}{\delta} \cdot \omega(8c\mu R) \right) \end{aligned}$$

869 where we used  $16(\alpha + \frac{1}{c})\gamma \leq 1$ . Now using  $\frac{1}{2\omega(2\mu R)} \leq A \leq \frac{R^2}{\varepsilon}$  from the assumption we get

$$\begin{aligned} \frac{1}{\tau} &\leq 300 \left( 1 + \left( \frac{R^2}{\varepsilon} + \frac{9\mu R}{\delta} \right) \cdot \omega(8c\mu R) \right) \\ &\leq 40 \left[ \frac{160\mu Rc}{\delta} + \frac{9R^2}{\varepsilon} \right] \cdot \omega(8c\mu R) \end{aligned}$$

870 where we used  $\delta \leq 8\mu R \cdot \omega(8\mu R)$  at the end. Putting together with Theorem 35 yields the result. ■

871
